# Supplementary material for: Toward comprehensive scientific information on plastic-related chemicals powered by artificial intelligence
Source: Royal Society of Chemistry journal article supplement (doi:10.1039/d5gc04822b), 2025-12-19
Supplement: d5gc04822b1.pdf [file d5gc04822b1.pdf]

## Supporting Information-Annex 1

# Toward Comprehensive Scientific Information on Plastic-Related Chemicals Powered by Artificial Intelligence

Kai Zhao<sup>§, a</sup>, Xiting Peng<sup>§, a</sup>, Ran Tao<sup>§, a</sup>, Yuchen Su<sup>c</sup>, ShiYue Huang<sup>c</sup>, Hang Fu<sup>d</sup>,  
Xiaonan Wang<sup>\*, a, b</sup>, Shanying Hu<sup>\*, a</sup>

<sup>a</sup>*Department of Chemical Engineering, Tsinghua University, Beijing 100084, P. R. China*

<sup>b</sup>*Institute for Carbon Neutrality, Tsinghua University, Beijing 100084, P. R. China*

<sup>c</sup>*Department of Computer Science, University of Electronic Science and Technology of China, Chengdu, Sichuan 610056, P. R. China*

<sup>d</sup>*School of Resources and Environment, Nanchang University, Nanchang, 330031, P. R. China*

<sup>§</sup> *Kai Zhao, Xiting Peng, and Ran Tao contributed equally to this paper*

*Corresponding Authors:*

*wangxiaonan@tsinghua.edu.cn (X. Wang), hxr-dce@tsinghua.edu.cn (S. Hu).*

The Supporting Information consists of two parts: Annex 1 (this document), which presents detailed methods and results, and Annex 2 (Excel file), which contains the finalized plastic-related chemical database. This Annex 1 file contains 108 pages, 22 supplementary figures and 24 supplementary tables.

## Table of Contents

|                                                                                                                                |    |
|--------------------------------------------------------------------------------------------------------------------------------|----|
| 1. Details of functional labels of plastic additives .....                                                                     | 6  |
| 1.1 Second-level functional labels (major categories).....                                                                     | 6  |
| Table S1. Second-level functional labels of plastic additives.....                                                             | 6  |
| 1.2 Third-level functional labels (subcategories) .....                                                                        | 7  |
| Table S2. Third-level functional labels of plastic additives.....                                                              | 8  |
| 2. Details of LLM-based workflow for parsing chemical composition.....                                                         | 13 |
| 2.1 Details of chemical-related properties retrieved from PubChem .....                                                        | 13 |
| Table S3. List of chemical-related properties. ....                                                                            | 13 |
| 2.2 Details of prompt engineering .....                                                                                        | 14 |
| 2.3 Evaluation and validation of LLM- based workflow for parsing chemical<br>composition .....                                 | 15 |
| Table S4. Confusion Matrix of the LLM Extraction Task .....                                                                    | 16 |
| Figure S1. Heatmap of LLM-based extraction performance (recall) across<br>naming categories and component complexities. ....   | 18 |
| Figure S2. Heatmap of LLM-based extraction performance (F1 score)<br>across naming categories and component complexities. .... | 18 |
| Figure S3. Heatmap of LLM-based extraction performance (Accuracy)<br>across naming categories and component complexities. .... | 18 |
| Table S5. Retrieval-based validation results for LLM extraction outputs<br>.....                                               | 19 |
| 2.4 Manual retrieval and validation of chemical structures.....                                                                | 20 |
| Table S6. Comparison of results of chemically structured manual searches.<br>.....                                             | 21 |
| 3. Details of ML models for predicting chemical toxicity.....                                                                  | 38 |
| 3.1 Details of training data for ML.....                                                                                       | 38 |
| Table S7. Class distributions for 7 toxicity indicators. ....                                                                  | 38 |

|                                                                                                         |    |
|---------------------------------------------------------------------------------------------------------|----|
| 3.2 Details of ML with multiple molecular representations .....                                         | 38 |
| Figure S4. Cumulative explained variance curve of concatenated<br>molecular fingerprints after PCA..... | 39 |
| 3.3 Results of multi-task learning.....                                                                 | 40 |
| Figure S5. Comparison of multi-task learning and single-task learning<br>performance. ....              | 40 |
| 3.4 Results of random hyperparameter optimization.....                                                  | 40 |
| Figure S6. Results of random hyperparameter optimization. ....                                          | 42 |
| 3.5 Results of predictive performance of ML models .....                                                | 42 |
| Table S8. Toxicity prediction results using different molecular<br>representations. ....                | 42 |
| Table S9. Model performance on the final train/validation/test split.....                               | 42 |
| 3.6 Substructure-level enrichment analysis .....                                                        | 43 |
| Figure S7. Results of substructure-level enrichment analysis. ....                                      | 44 |
| 3.7 Linking molecular structure-based results to the AOP framework and OECD<br>test guidelines .....    | 45 |
| Table S10. MIE, KE, and AO information of toxicity endpoint (C).....                                    | 45 |
| Table S11. MIE, KE, and AO information of toxicity endpoint (M). ....                                   | 45 |
| Table S12. MIE, KE, and AO information of toxicity endpoint (R).....                                    | 45 |
| Table S13. MIE, KE, and AO information of toxicity endpoint (STOT_RE,<br>OECD Test No. 407). ....       | 46 |
| Table S14. MIE, KE, and AO information of toxicity endpoint (STOT_RE,<br>OECD Test No. 408). ....       | 47 |
| Table S15. MIE, KE, and AO information of toxicity endpoint (AqTox,<br>AOP312). ....                    | 47 |
| Table S16. MIE, KE, and AO information of toxicity endpoint (AqTox,<br>AOP312). ....                    | 47 |
| Table S17. MIE, KE, and AO information of toxicity endpoint (RespSens).                                 |    |

|                                                                                                                            |    |
|----------------------------------------------------------------------------------------------------------------------------|----|
| .....                                                                                                                      | 48 |
| 4. Details of fuzzy search method for predicting functional labels .....                                                   | 50 |
| 4.1 Results of “conserved sequences” .....                                                                                 | 50 |
| Table S18. Common sequence of third-level functional labels. ....                                                          | 50 |
| 4.2 Similarity scores for third-level functional property labels.....                                                      | 58 |
| Figure S8. Bubble plot of the distribution of similarity scores among third-level functional labels. ....                  | 58 |
| 4.3 Manual validation of fuzzy-search functional predictions .....                                                         | 59 |
| Table S19. Sampling manual verification results of fuzzy search. ....                                                      | 59 |
| 5. Details of exact search method for predicting functional labels.....                                                    | 74 |
| 5.1 Details of SMARTS pattern .....                                                                                        | 74 |
| 5.2 Results of the exact search method.....                                                                                | 80 |
| Table S20. Toxicity prediction results using different molecular representations. ....                                     | 80 |
| Figure S9. The results of the exact search method for matching phthalate plasticizers are presented below.....             | 82 |
| Figure S10. The results of the exact search method for matching terephthalate plasticizers are presented below. ....       | 83 |
| Figure S11. The results of the exact search method for matching isophthalate plasticizers are presented below. ....        | 84 |
| Figure S12. The results of the exact search method for matching adipic acid esters plasticizers are presented below. ....  | 85 |
| Figure S13. The results of the exact search method for matching azelaic acid esters plasticizers are presented below. .... | 86 |
| Figure S14. The results of the exact search method for matching fumaric acid esters plasticizers are presented below. .... | 86 |
| Figure S15. The results of the exact search method for matching citric acid esters plasticizers are presented below.....   | 87 |

|                                                                                                                                                              |     |
|--------------------------------------------------------------------------------------------------------------------------------------------------------------|-----|
| Figure S16. The results of the exact search method for matching trimellitate plasticizers are presented below. ....                                          | 87  |
| Figure S17. The results of the exact search method for matching itaconic acid esters plasticizers are presented below. ....                                  | 88  |
| Figure S18. The results of the exact search method for matching maleic acid esters plasticizers are presented below. ....                                    | 88  |
| Figure S19. The results of the exact search method for matching oleate plasticizers are presented below. ....                                                | 89  |
| Figure S20. The results of the exact search method for matching sebacic acid esters plasticizers are presented below. ....                                   | 90  |
| Figure S21. The results of the exact search method for matching epoxy derivatives plasticizers are presented below. ....                                     | 91  |
| 5.3 Results of the exact search method.....                                                                                                                  | 91  |
| Table S21. Sampling manual verification results of exact search. ....                                                                                        | 91  |
| 6. Details of Discussion .....                                                                                                                               | 96  |
| 6.1 Results of functional–toxicological relationship .....                                                                                                   | 96  |
| Table S22. The average toxicity of chemicals corresponding to each third-level functional label.....                                                         | 96  |
| Figure S22. The heatmap of the 83 third-level functional labels and 7 toxicity indicators.....                                                               | 102 |
| Table S23. Results of Pearson’s chi-square test.....                                                                                                         | 103 |
| 6.2 Illustrative cases of plastic formulation.....                                                                                                           | 103 |
| Table S24. Different PVC agricultural films use various additives choices in their formulations, calculated using the mass parts counting method [2-8]. .... | 104 |
| Ref.....                                                                                                                                                     | 105 |

## 1. Details of functional labels of plastic additives

### 1.1 Second-level functional labels (major categories)

Based on the distinct functional attributes that plastic additives provide to plastics, the second-level functional labels were defined as the following 24 classes.

Table S1. Second-level functional labels of plastic additives.

| Num. | Second-level functional labels       | Functional descriptions                                                                             |
|------|--------------------------------------|-----------------------------------------------------------------------------------------------------|
| A01  | Plasticizer                          | Enhances flexibility and workability of plastic materials by reducing intermolecular forces.        |
| A02  | Antioxidant                          | Prevents or slows down oxidation to protect polymers from degradation during processing and use.    |
| A03  | Light stabilizer                     | Shields plastics from UV-induced degradation, preserving appearance and mechanical properties.      |
| A04  | Flame retardant                      | Reduces flammability and delays ignition or flame propagation in plastic products.                  |
| A05  | Curing agent and curing accelerators | Initiate or accelerate crosslinking reactions during polymer curing processes.                      |
| A06  | Heat stabilizer                      | Protects polymers from thermal degradation during processing and high-temperature use.              |
| A07  | Colorants                            | Impart color to plastics for aesthetic or functional purposes.                                      |
| A08  | Coupling agent                       | Enhances adhesion between dissimilar materials, improving mechanical strength and durability.       |
| A09  | Crosslinking agent                   | Promotes the formation of chemical bonds between polymer chains to increase strength and stability. |
| A10  | Photo Initiator                      | Generates reactive species upon light exposure to start polymerization or curing reactions.         |
| A11  | Antimicrobial agent                  | Inhibits the growth of bacteria, fungi, and other microbes on plastic surfaces.                     |
| A12  | Polymerization inhibitor             | Prevents unwanted or premature polymerization during processing or storage.                         |

| Num. | Second-level functional labels | Functional descriptions                                                                                                   |
|------|--------------------------------|---------------------------------------------------------------------------------------------------------------------------|
| A13  | Chemical Foaming Agents        | Produces gas during processing to create a cellular structure in foamed plastic products.                                 |
| A14  | Antistatic agents              | Reduces surface static charge buildup to prevent dust attraction and electrical discharge.                                |
| A15  | Fluorescent whitener           | Absorbs UV light and emits blue light to enhance brightness and reduce yellowing.                                         |
| A16  | Drip and mist eliminators      | Minimizes dripping or misting by altering surface tension or flow characteristics.                                        |
| A17  | Lubricants                     | Reduces friction between polymer surfaces during processing to improve flow and release.                                  |
| A18  | Nucleator                      | Promotes the formation of crystalline structures during polymer solidification to enhance mechanical properties.          |
| A19  | Impact Modifiers               | A type of chemical that improves the low-temperature embrittlement of polymer materials and gives them greater toughness. |
| A20  | Anti-sticking agent            | Prevents plastic surfaces from adhering to equipment or each other during processing.                                     |
| A21  | Releasing agent                | A type of chemical used to prevent other materials from bonding to surfaces                                               |
| A22  | Acid binding agent             | Neutralizes acidic degradation products to stabilize polymer performance.                                                 |
| A23  | Slipping agent                 | A type of chemical that reduces the coefficient of friction on plastic surfaces to the required level or value.           |
| A24  | Others                         | /                                                                                                                         |

## 1.2 Third-level functional labels (subcategories)

Based on differences in characteristic functional groups, detailed descriptions of the 83 third-level functional labels are provided, along with the number of manually

annotated data entries collected for each.

Table S2. Third-level functional labels of plastic additives.

| Num. | Third-level functional labels         | Count of manually annotated data |
|------|---------------------------------------|----------------------------------|
| C00  | Plasticizer_Phthalate                 | 33                               |
| C01  | Plasticizer_Terephthalate             | 1                                |
| C02  | Plasticizer_Isophthalate              | 1                                |
| C03  | Plasticizer_Adipic acid esters        | 12                               |
| C04  | Plasticizer_Azelaic acid esters       | 2                                |
| C05  | Plasticizer_Fumaric acid esters       | 2                                |
| C06  | Plasticizer_Citric acid esters        | 5                                |
| C07  | Plasticizer_Trimellitate              | 4                                |
| C08  | Plasticizer_Itaconic acid esters      | 2                                |
| C09  | Plasticizer_Lauric acid esters        | 2                                |
| C10  | Plasticizer_Maleic acid esters        | 4                                |
| C11  | Plasticizer_Oleate                    | 5                                |
| C12  | Plasticizer_Sebacic acid esters       | 7                                |
| C13  | Plasticizer_Stearate                  | 3                                |
| C14  | Plasticizer_Sulfonic acid derivatives | 3                                |



| Num. | Third-level functional labels                                                                                   | Count of manually annotated data |
|------|-----------------------------------------------------------------------------------------------------------------|----------------------------------|
| C15  | Plasticizer_Glycol derivatives, glycerol derivatives, propylene glycol derivatives and other polyol derivatives | 17                               |
| C16  | Plasticizer_Epoxy derivatives                                                                                   | 5                                |
| C17  | Plasticizer_Phosphoric acid                                                                                     | 12                               |
| C18  | Plasticizer_Chlorine Plasticizer                                                                                | 1                                |
| C19  | Plasticizer_Polymeric plasticizers                                                                              | 4                                |
| C20  | Plasticizer_Other types                                                                                         | 24                               |
| C21  | Antioxidant_Amines                                                                                              | 15                               |
| C22  | Antioxidant_Bisphenol monoacrylate                                                                              | 2                                |
| C23  | Antioxidant_Hindered phenolics                                                                                  | 54                               |
| C24  | Antioxidant_Metal passivator                                                                                    | 4                                |
| C25  | Antioxidant_Phosphite                                                                                           | 14                               |
| C26  | Antioxidant_Thioether                                                                                           | 10                               |
| C27  | Antioxidant_Triazine                                                                                            | 6                                |
| C28  | Antioxidant_Other types                                                                                         | 2                                |
| C29  | Light stabilizer_Benzoate                                                                                       | 4                                |
| C30  | Light stabilizer_Benzophenones                                                                                  | 13                               |
| C31  | Light stabilizer_Benzpropyltriazole                                                                             | 14                               |

| Num. | Third-level functional labels                             | Count of manually annotated data |
|------|-----------------------------------------------------------|----------------------------------|
| C32  | Light stabilizer_Cyanoacrylates                           | 2                                |
| C33  | Light stabilizer_Hindered amines                          | 20                               |
| C34  | Light stabilizer_Hydroxybenzotriazines                    | 3                                |
| C35  | Light stabilizer_Light shielding agents                   | 2                                |
| C36  | Light stabilizer_Nickel-containing compounds              | 4                                |
| C37  | Light stabilizer_Salicylate esters                        | 3                                |
| C38  | Light stabilizer_Other types                              | 8                                |
| C39  | Flame retardant_Halogenated Flame retardant               | 43                               |
| C40  | Flame retardant_Inorganic flame retardant                 | 11                               |
| C41  | Flame retardant_Phosphorus Flame retardant                | 21                               |
| C42  | Flame retardant_Other types                               | 4                                |
| C43  | Curing agents and curing accelerators_Acid anhydride      | 10                               |
| C44  | Curing agents and curing accelerators_Amines              | 33                               |
| C45  | Curing agents and curing accelerators_Other Types         | 9                                |
| C46  | Heat stabilizer_Inorganic and organic lead salts          | 5                                |
| C47  | Heat stabilizer_Lead diformate                            | 3                                |
| C48  | Heat stabilizer_Metal soaps and metal salts               | 16                               |
| C49  | Heat stabilizer_Organic primary and secondary stabilizers | 10                               |

| Num. | Third-level functional labels             | Count of manually annotated data |
|------|-------------------------------------------|----------------------------------|
| C50  | Heat stabilizer_Organic tin               | 8                                |
| C51  | Colorants_Inorganic Colorants             | 14                               |
| C52  | Colorants_Organic colorants               | 28                               |
| C53  | Coupling agent_Organic Chromium           | 1                                |
| C54  | Coupling agent_Silanes                    | 36                               |
| C55  | Crosslinking agent_Organic peroxides      | 22                               |
| C56  | Crosslinking agent_Other types            | 12                               |
| C57  | Photo Initiator_Photoinitiator            | 22                               |
| C58  | Photo Initiator_Photosensitizing aids     | 2                                |
| C59  | Antimicrobial agent                       | 17                               |
| C60  | Polymerization inhibitor                  | 15                               |
| C61  | Chemical Foaming Agents_Azo               | 4                                |
| C62  | Chemical Foaming Agents_Nitroso compounds | 2                                |
| C63  | Chemical Foaming Agents_Sulfonylhydrazine | 3                                |
| C64  | Chemical Foaming Agents_Other types       | 5                                |
| C65  | Antistatic agents_Amphoterio ion type     | 3                                |
| C66  | Antistatic agents_Anionic                 | 1                                |
| C67  | Antistatic agents_Cationic                | 4                                |

| Num. | Third-level functional labels                        | Count of manually annotated data |
|------|------------------------------------------------------|----------------------------------|
| C68  | Antistatic agents_Flammable                          | 1                                |
| C69  | Antistatic agents_Nonionic                           | 3                                |
| C70  | Antistatic agents_Polymer type                       | 1                                |
| C71  | Fluorescent whitener                                 | 12                               |
| C72  | Drip and mist eliminators_Compounded Flow Drops      | 2                                |
| C73  | Drip and mist eliminators_Fluidized droplet monomers | 9                                |
| C74  | Lubricants_Fatty acids and derivatives               | 10                               |
| C75  | Nucleator                                            | 8                                |
| C76  | Impact Modifiers                                     | 5                                |
| C77  | Anti-sticking agent                                  | 3                                |
| C78  | Releasing agent_Other types                          | 1                                |
| C79  | Releasing agent_amides                               | 2                                |
| C80  | Acid binding agent_nan                               | 2                                |
| C81  | Slipping agent_Fatty acids and derivatives           | 1                                |
| C82  | Others                                               | 1                                |

## 2. Details of LLM-based workflow for parsing chemical composition

### 2.1 Details of chemical-related properties retrieved from PubChem

For each chemical entry, 17 types of properties were retrieved from PubChem. The detailed records are included in the plastic-related chemical database presented in Annex 3.

Table S3. List of chemical-related properties.

| Properties       | Descriptions                                                                                                                                                                                                                                                                                        |
|------------------|-----------------------------------------------------------------------------------------------------------------------------------------------------------------------------------------------------------------------------------------------------------------------------------------------------|
| Molecular_weight | The molecular weight is the sum of all atomic weights of the constituent atoms in a compound, measured in g/mol. In the absence of explicit isotope labelling, averaged natural abundance is assumed. If an atom bears an explicit isotope label, 100% isotopic purity is assumed at this location. |
| Melting point    | Melting point (freezing point) (M.P.) is the temperature at which a crystal exists in a solid-liquid coexistence state during the process of changing its physical state from solid to liquid under atmospheric pressure.                                                                           |
| TGA              | TGA data represent the cumulative weight loss percentages of a substance at specified temperatures, indicating its thermal decomposition behavior.                                                                                                                                                  |
| XLogP            | Computationally generated octanol-water partition coefficient or distribution coefficient. XLogP is used as a measure of hydrophilicity or hydrophobicity of a molecule.                                                                                                                            |
| ExactMass        | The mass of the most likely isotopic composition for a single molecule, corresponding to the most intense ion/molecule peak in a mass spectrum.                                                                                                                                                     |
| MonoisotopicMass | The mass of a molecule, calculated using the mass of the most abundant isotope of each element.                                                                                                                                                                                                     |
| TPSA             | Topological polar surface area, computed by the algorithm described in the paper by Ertl et al <sup>[1]</sup> .                                                                                                                                                                                     |

| Properties         | Descriptions                                                                                            |
|--------------------|---------------------------------------------------------------------------------------------------------|
| Complexity         | The molecular complexity rating of a compound, computed using the Bertz/Hendrickson/Ihlenfeldt formula. |
| Charge             | The total (or net) charge of a molecule.                                                                |
| HBondDonorCount    | Number of hydrogen-bond donors in the structure.                                                        |
| HBondAcceptorCount | Number of hydrogen-bond acceptors in the structure.                                                     |
| HeavyAtomCount     | Number of non-hydrogen atoms.                                                                           |
| IsotopeAtomCount   | Number of atoms with enriched isotope(s)                                                                |
| CovalentUnitCount  | Number of covalently bound units.                                                                       |
| PatentCount        | Number of patent documents linked to this compound.                                                     |
| PatentFamilyCount  | Number of unique patent families linked to this compound (e.g. patent documents grouped by family).     |
| LiteratureCount    | Number of articles linked to this compound (by PubChem's consolidated literature analysis).             |

## 2.2 Details of prompt engineering

Considering both the model's performance and token cost, GPT-4 Turbo was selected as the preferred model. Interactions were conducted using the following prompts via API access to the GPT-4 Turbo model.

### 1) Question1:

Respond in JSON format with 0 or 1, where 1 means 'yes' and 0 means 'no'. Based on the text provided, answer the following three questions: Is the described substance a mixture? Does it involve unknown reaction products? Does it contain polymers?

Example of the output format:

```
{  
  
  "mixture": 1,  
  
  "reaction": 0,  
  
  "polymers": 1  
  
}
```

2) Question2:

Answer only the names in json format. What are the main ingredients in this mixture (answer with common names, Retain only the name associated with the chemical)?

Example of the output format:

```
{  
  
  "main_ingredients": ["xxxx"]  
  
}
```

3) Question3:

Answer only the name. What is the common name of this substance (If you are unsure of the common name of the substance, answer "unsure").)?

## 2.3 Evaluation and validation of LLM- based workflow for parsing chemical composition

Each extracted result from the mixture entries was manually examined and assigned to its corresponding category in the confusion matrix (Table S4). The counts for each category were then used in Equations 1 to 4 to calculate the four performance

metrics.

Table S4. Confusion Matrix of the LLM Extraction Task

|                   | Should be extracted | Should not be extracted |
|-------------------|---------------------|-------------------------|
| LLM extracted     | True Positive (TP)  | False Positive (FP)     |
| LLM not extracted | False Negative (FN) | True Negative (TN)      |

1) Precision:

$$Precision = \frac{TP}{TP + FP} \quad (Eq - 1)$$

This is the proportion of correctly extracted values among all extractions by the model.

2) Recall:

$$Recall = \frac{TP}{TP + FN} \quad (Eq - 2)$$

This is the proportion of correct values extracted by the model.

3) F1 Score:

$$F1\ Score = 2 * Recall * \frac{Precision}{Recall + Precision} \quad (Eq - 3)$$

The F1 Score is the harmonic mean of Precision and Recall. It balances the trade-off between Precision and Recall, providing a single measure of overall model performance.

4) Accuracy

$$Accuracy = \frac{TP}{TP + FN + FP} \quad (Eq - 4)$$

Accuracy represents the proportion of correctly extracted values (true positives) among all cases, including missed values (false negatives) and incorrect extractions (false positives).

Manual verification confirmed whether the substances extracted by the LLM matched the relevant components explicitly or implicitly mentioned in the original text.



Predictions were regarded as correct when the identified entities corresponded to reasonable reactants, monomers, or major compositional substances associated with the described system. Chemically plausible but unconfirmed cases were recorded separately as undeterminable or not found, to indicate the intrinsic difficulty of manually resolving mixture compositions.

The outcomes of this manual verification formed the basis of both Figure S1-S4 and Table S5. Figure S1-S4 visualizes the overall distribution of extraction performance, where the color intensity represents the performance and the square size indicates the number of samples within each group. Table S5 provides the corresponding quantitative statistics, listing precision, recall, F1 score, and accuracy values for each naming category and compositional complexity. Together, these results reflect how effectively the LLM achieved the intended relevance-based extraction objective, i.e., identifying substances related to the mixture or reaction system rather than reproducing the final product structures.

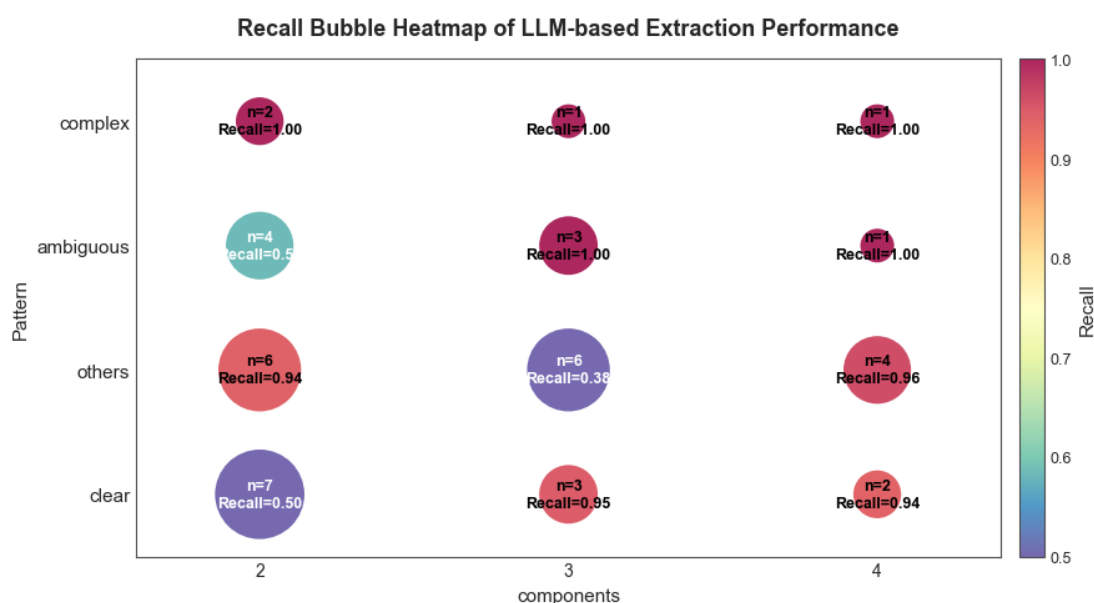

Figure S1. Heatmap of LLM-based extraction performance (recall) across naming categories and component complexities.

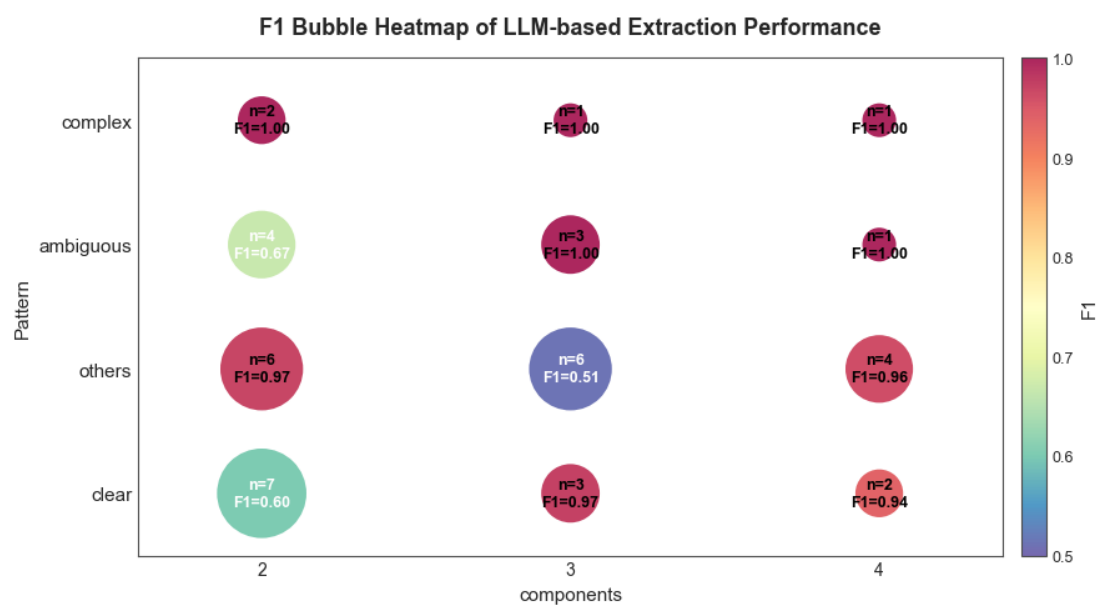

Figure S2. Heatmap of LLM-based extraction performance (F1 score) across naming categories and component complexities.

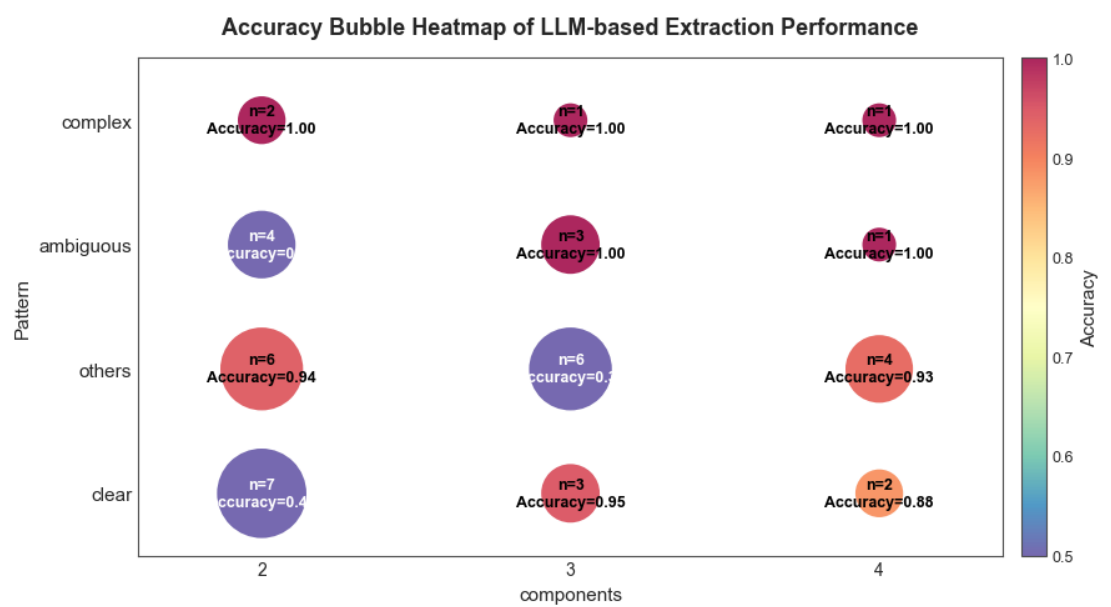

Figure S3. Heatmap of LLM-based extraction performance (Accuracy) across naming categories and component complexities.

As shown in Figure S3, the overall mean F1 value was approximately 0.80,

indicating reliable extraction performance. High F1 scores ( $\geq 0.9$ ) were achieved for ambiguous/regulatory and  $\geq 4$ -component structural names, while the lowest performance ( $F1 \approx 0.19$ ) appeared in the 3-component complex/nested category.

Table S5. Retrieval-based validation results for LLM extraction outputs

| Naming Category | Components | Precision | Recall | F1   | Accuracy |
|-----------------|------------|-----------|--------|------|----------|
| Ambiguous       | 2          | 0.78      | 0.58   | 0.67 | 0.50     |
| Ambiguous       | 3          | 1.00      | 1.00   | 1.00 | 1.00     |
| Ambiguous       | 4          | 1.00      | 1.00   | 1.00 | 1.00     |
| TOTAL           |            | 0.90      | 0.78   | 0.84 | 0.72     |
| Clear           | 2          | 0.75      | 0.50   | 0.60 | 0.43     |
| Clear           | 3          | 1.00      | 0.95   | 0.97 | 0.95     |
| Clear           | 4          | 0.94      | 0.94   | 0.94 | 0.88     |
| TOTAL           |            | 0.90      | 0.76   | 0.83 | 0.70     |
| Complex         | 2          | 1.00      | 1.00   | 1.00 | 1.00     |
| Complex         | 3          | 1.00      | 1.00   | 1.00 | 1.00     |
| Complex         | 4          | 1.00      | 1.00   | 1.00 | 1.00     |
| TOTAL           |            | 1.00      | 1.00   | 1.00 | 1.00     |
| Others          | 2          | 1.00      | 0.94   | 0.97 | 0.94     |
| Others          | 3          | 0.77      | 0.38   | 0.51 | 0.34     |
| Others          | 4          | 0.96      | 0.96   | 0.96 | 0.93     |
| TOTAL           |            | 0.93      | 0.74   | 0.82 | 0.70     |
| OVERALL         |            | 0.92      | 0.78   | 0.85 | 0.74     |

Table S5 summarizes the quantitative metrics of the manual and retrieval-based validation for the 40 representative samples. The model performs excellently for clear and complex categories, achieving high F1 scores ( $\geq 0.90$ ). It demonstrates perfect extraction in the complex category ( $F1 = 1.00$ ) for all component levels, indicating robust performance for well-defined nomenclature. Challenges with Ambiguous and Multi-Component Names: Performance drops notably for 3-component complex/nested names, as shown in the others category ( $F1 = 0.51$ ), highlighting difficulties in parsing more complex or ambiguous names. In conclusion, the LLM is highly effective for well-defined nomenclature but struggles with complex, multi-layered names.

## 2.4 Manual retrieval and validation of chemical structures

To validate the LLM-assisted extraction results, a manual retrieval process was carried out using several authoritative databases, including PubMed, SciFinder, and ECHA, which are considered reliable platforms for chemical structure retrieval. ChemicalBook and Chemical Encyclopedia were used as complementary resources. The retrieval process followed three main steps:

- 1) Initial Search Using CAS Numbers. When available, CAS numbers were used as the primary search method to verify whether the substance could be identified as a pure compound. This method typically allowed for the identification of pure substances associated with their CAS numbers or structures.
- 2) Structure Retrieval via SciFinder. For substances without a CAS number or when

additional verification was needed, SciFinder was employed to search for the corresponding chemical structures. The structures retrieved via SciFinder were cross-referenced to validate their correctness.

- 3) Comparison and Categorization. After retrieving the structures, they were compared to the predictions made by the LLM. The retrieval results were classified into the 5 categories.

Table S6. Comparison of results of chemically structured manual searches.

| Num. | CAS      | Name                                                                                                                               | Retrieval<br>Source | Retrieved<br>Structure | LLM<br>Prediction             |
|------|----------|------------------------------------------------------------------------------------------------------------------------------------|---------------------|------------------------|-------------------------------|
| 40   | 1000     | Quaternary ammonium compounds, [2-[[2-[(2-carboxyethyl)(2-hydroxyethyl)amino]ethylamino]-2-oxoethyl]cocoalkyldimethyl, inner salts | None                | Not retrieved          | Quaternary ammonium compounds |
|      | 85-64-1  |                                                                                                                                    |                     |                        |                               |
| 75   | 1003     | Phosphoric acid, mixed esters with [1,1'-biphenyl]-4,4'-diol and phenol                                                            | ADEKA product info  | Polymer mixture        | Phosphoric acid               |
|      | 300-73-9 |                                                                                                                                    |                     |                        | Biphenyl-4,4'-diol            |
| 197  | 1013     | Barium calcium                                                                                                                     | None                | Not retrieved          | Barium;                       |
|      | 56-      | magnesium strontium                                                                                                                |                     |                        | Calcium;                      |

| Num. | CAS      | Name                                                                                                             | Retrieval<br>Source | Retrieved<br>Structure                                                         | LLM<br>Prediction                        |
|------|----------|------------------------------------------------------------------------------------------------------------------|---------------------|--------------------------------------------------------------------------------|------------------------------------------|
| 1112 | 96-1     | zinc oxide phosphate,<br>copper-doped                                                                            | None                | Not<br>retrieved                                                               | Magnesium;<br>Strontium;<br>Zinc; Copper |
|      | 1150     | ester of fatty acid<br>(saturated C4-22,<br>unsaturated C16-18) with                                             |                     |                                                                                | fatty acid ester<br>aliphatic;           |
|      | 19-51-7  | aliphatic monohydric<br>alcohol (saturated C2-18)<br>and aromatic polyol ether                                   |                     |                                                                                | alcohol;<br>aromatic<br>polyol ether     |
|      |          |                                                                                                                  |                     |                                                                                |                                          |
| 2940 | 1571     | 1,4-Benzenedicarboxylic                                                                                          | ECHA                | Three<br>isomers<br>(CAS<br>1429441-<br>82-6,<br>6422-86-<br>2, 1962-<br>75-0) | Dibutyl<br>phthalate;                    |
|      | 954-81-8 | acid, mixed Bu and 2-<br>ethylhexyl diesters                                                                     |                     |                                                                                | Di(2-<br>ethylhexyl)<br>phthalate        |
|      |          |                                                                                                                  |                     |                                                                                |                                          |
|      |          |                                                                                                                  |                     |                                                                                |                                          |
| 4053 | 2245     | Borate(1-), bis[2-                                                                                               | Chemica<br>1        | Borate<br>complex;<br>tributylam                                               | Boric acid,<br>salicylic acid,           |
|      | 0-96-0   | (hydroxy-<br> O)benzoato(2-)- |                     |                                                                                | dibutylamine                             |

| Num. | CAS                 | Name                                                                                            | Retrieval<br>Source | Retrieved<br>Structure | LLM<br>Prediction                                                                             |
|------|---------------------|-------------------------------------------------------------------------------------------------|---------------------|------------------------|-----------------------------------------------------------------------------------------------|
|      |                     | $\frac{1}{2}\text{O}]$ -, (T-4)-, hydrogen,<br>compd. with N,N-dibutyl-<br>1-butanamine (1:1:1) | edia                | ine                    | Synthetic<br>fibers;<br>Aluminum<br>oxide;<br>Calcium oxide;<br>Magnesium<br>oxide;<br>Silica |
| 5892 | 3292<br>11-<br>92-9 | Synthetic fibers,<br>alumina–calcia–silica–<br>zirconia glass                                   | None                | Not<br>retrieved       | Hexanoic acid;<br>Benzoic acid;<br>Trimethylolpropane                                         |
| 8186 | 6107<br>87-<br>76-3 | Hexanoic acid, 2-ethyl-,<br>mixed triesters with<br>benzoic acid and<br>trimethylolpropane      | None                | Not<br>retrieved       | Hexanoic acid;<br>Benzoic acid;<br>Neopentyl glycol                                           |
| 8187 | 6107<br>87-<br>77-4 | Hexanoic acid, 2-ethyl-,<br>mixed diesters with<br>benzoic acid and<br>neopentyl glycol         | None                | Not<br>retrieved       | Hexanoic acid;<br>Benzoic acid;<br>Neopentyl glycol                                           |
| 9485 | 6842                | Fatty acids, C16 and C18-                                                                       | ECHA                | TMP                    | Trimethylolpro                                                                                |

| Num.  | CAS  | Name                                                                                                                 | Retrieval<br>Source | Retrieved<br>Structure | LLM<br>Prediction            |
|-------|------|----------------------------------------------------------------------------------------------------------------------|---------------------|------------------------|------------------------------|
| 9894  | 4-   | unsatd., triesters with                                                                                              | None                | trioleate              | pane trioleate               |
|       | 27-1 | trimethylolpropane                                                                                                   |                     |                        |                              |
|       | 6899 | Linseed oil, Bu ester,                                                                                               |                     | Not                    | Linseed oil;                 |
|       | 1-   | epoxidized                                                                                                           |                     | retrieved              | Epoxidized                   |
| 10384 | 46-8 |                                                                                                                      | Chemical Book       |                        | butyl ester                  |
|       | 7350 | 2-Naphthalenesulfonic acid, 7-(benzoylamino)-4-hydroxy-3-[2-[4-[2-(4-sulfophenyl)diazenyl]phenyl]diazenyl]-, compds. |                     | ACI dye; guanidine     | Acid Red 52, Basic Violet 14 |
|       | 36-5 | with N,N'-bis(mixed Ph and tolyl and xylyl)guanidine monohydrochloride                                               |                     | ; HCl                  | (incorrect)                  |
|       | 7420 | D-Glucopyranose, oligomeric, C10-16-alkyl                                                                            |                     | Alkyl polygluco        | Alkyl polyglucoside;         |
| 10434 | 87-  | glycosides, 2-hydroxy-3-                                                                                             | ECHA                | side;                  | Sodium                       |
|       | 49-6 | sulfopropyl ethers, sodium salts                                                                                     |                     | sulfopropyl ether      | hydroxy sulfopropyl ether    |
|       |      |                                                                                                                      |                     |                        |                              |



| Num.  | CAS               | Name                                                                                      | Retrieval<br>Source | Retrieved<br>Structure                 | LLM<br>Prediction                                                |
|-------|-------------------|-------------------------------------------------------------------------------------------|---------------------|----------------------------------------|------------------------------------------------------------------|
| 11211 | 8023<br>-77-<br>6 | Resins, oleo-, capsicum                                                                   | None                | Not<br>retrieved                       | Resins;<br>Oleo;<br>Capsicum                                     |
| 11236 | 8050<br>-25-<br>7 | Resin acids and rosin<br>acids, esters with TEG                                           | SciFinde<br>r       | Resin<br>acids;<br>TEG                 | Resin acids;<br>Rosin acids;<br>Triethylene<br>glycol            |
| 11237 | —                 | Resin acids and rosin<br>acids, esters with<br>pentaerythritol                            | Chemica<br>lBook    | Resin<br>acids;<br>pentaeryt<br>hritol | Rosin;<br>Pentaerythritol                                        |
| 11552 | —                 | Fatty acids C16-18, esters<br>with diethylene glycol                                      | SciFinde<br>r       | Correct<br>mixture                     | Fatty acid<br>esters<br>2-                                       |
| 11579 | —                 | Hexanoic acid, 2-ethyl-,<br>mixed diesters with<br>benzoic acid and<br>triethylene glycol | None                | Not<br>retrieved                       | ethylhexanoic<br>acid;<br>benzoic acid;<br>triethylene<br>glycol |
| 11632 | —                 | mixture of methyl-                                                                        | None                | Not                                    | alkanamides                                                      |

| Num.  | CAS | Name                     | Retrieval<br>Source | Retrieved<br>Structure | LLM<br>Prediction   |
|-------|-----|--------------------------|---------------------|------------------------|---------------------|
| 12681 | —   | branched and linear C14- |                     | retrieved              |                     |
|       |     | C18alkanamides, derived  |                     |                        |                     |
|       |     | from fatty acids         |                     |                        |                     |
|       |     | Phosphoric Acid, C9-11-  |                     |                        | Phosphoric<br>Acid; |
| 12682 | —   | Branched And Linear      | None                | Not                    | Branched And        |
|       |     | Alkyl Esters,            |                     | retrieved              | Linear Alkyl        |
|       |     | Potassiumsalts           |                     |                        | Esters;             |
|       |     | Phosphoric Acid, C12-    |                     |                        | Potassium<br>Salts  |
| 16377 | —   | 14-Branched And Linear   | None                | Not                    | Phosphoric<br>Acid; |
|       |     | Alkyl Esters, Potassium  |                     | retrieved              | Potassium           |
|       |     | Salts                    |                     |                        | Salts               |
|       |     | Formaldehyde-2-          | ChemNe              | 2-                     |                     |
| 16377 | —   | nonylphenol (1:1)        | t                   | Nonylphe<br>nol;       | Formaldehyde;       |
|       |     |                          |                     | formaldehy             | nonylphenol         |
|       |     |                          |                     |                        |                     |
|       |     |                          |                     | yde                    |                     |

| Num.  | CAS | Name                                                                                                       | Retrieval<br>Source | Retrieved<br>Structure | LLM<br>Prediction                                                                                                           |
|-------|-----|------------------------------------------------------------------------------------------------------------|---------------------|------------------------|-----------------------------------------------------------------------------------------------------------------------------|
| 16498 | —   | TPAI6[MEG]5[DEG]<br>mixture                                                                                | None                | Not<br>retrieved       | Tetraphenylars<br>onium;                                                                                                    |
|       |     |                                                                                                            |                     |                        | Monoethylene<br>glycol;<br>Diethylene<br>glycol<br>Aluminum<br>hexanoate;<br>Ammonium<br>hexanoate;<br>Barium<br>hexanoate; |
| 16542 | —   | All salts of Al, NH <sub>4</sub> , Ba,<br>Ca, Co, Cu, Fe, Li, Mg,<br>Mn, K, Na, and Zn of<br>Hexanoic acid | None                | Not<br>retrieved       | Calcium<br>hexanoate;<br>Cobalt<br>hexanoate;<br>Copper<br>hexanoate;<br>Iron<br>hexanoate;                                 |
|       |     |                                                                                                            |                     |                        |                                                                                                                             |

| Num.  | CAS | Name                                                                                                  | Retrieval<br>Source | Retrieved<br>Structure | LLM<br>Prediction                              |
|-------|-----|-------------------------------------------------------------------------------------------------------|---------------------|------------------------|------------------------------------------------|
|       |     |                                                                                                       |                     |                        | Lithium                                        |
|       |     |                                                                                                       |                     |                        | hexanoate;                                     |
|       |     |                                                                                                       |                     |                        | Magnesium                                      |
|       |     |                                                                                                       |                     |                        | hexanoate;                                     |
|       |     |                                                                                                       |                     |                        | Manganese                                      |
|       |     |                                                                                                       |                     |                        | hexanoate;                                     |
|       |     |                                                                                                       |                     |                        | Potassium                                      |
|       |     |                                                                                                       |                     |                        | hexanoate;                                     |
|       |     |                                                                                                       |                     |                        | Sodium                                         |
|       |     |                                                                                                       |                     |                        | hexanoate;                                     |
|       |     |                                                                                                       |                     |                        | Zinc hexanoate                                 |
| 16792 | —   | POH n-C10–C35                                                                                         | None                | Not<br>retrieved       | Petroleum<br>Hydrocarbons                      |
|       |     | Reaction mass of tris(2-<br>chloropropyl) phosphate<br>and tris(2-chloro-1-<br>methylethyl) phosphate |                     |                        | tris(2-<br>chloropropyl)<br>phosphate;         |
| 16843 | —   | and Phosphoric acid,<br>bis(2-chloro-1-<br>methylethyl)                                               | None                | Not<br>retrieved       | tris(2-chloro-1-<br>methylethyl)<br>phosphate; |
|       |     | 2-                                                                                                    |                     |                        | Phosphoric                                     |

| Num.  | CAS | Name                                                                                                                                                    | Retrieval<br>Source | Retrieved<br>Structure | LLM<br>Prediction                                                                                                                                            |
|-------|-----|---------------------------------------------------------------------------------------------------------------------------------------------------------|---------------------|------------------------|--------------------------------------------------------------------------------------------------------------------------------------------------------------|
|       |     | chloropropyl ester and<br>Phosphoric acid, 2-<br>chloro-1-methylethyl<br>bis(2-chloropropyl) ester                                                      |                     |                        | acid, bis(2-<br>chloro-1-<br>methylethyl) 2-<br>chloropropyl<br>ester;<br>Phosphoric<br>acid, 2-chloro-<br>1-methylethyl<br>bis(2-<br>chloropropyl)<br>ester |
| 16865 | —   | mixture composed of<br>97 % tetraethyl<br>orthosilicate (TEOS) with<br>CAS No 78-10-4 and 3 %<br>hexamethyldisilazane<br>(HMDS) with CAS No<br>999-97-3 | None                | Not<br>retrieved       | tetraethyl<br>orthosilicate;<br>hexamethyldisi<br>lazane                                                                                                     |
| 17013 | —   | acids, C2-C24, aliphatic,<br>linear, monocarboxylic                                                                                                     | None                | Not<br>retrieved       | fatty acids;<br>glycerol esters                                                                                                                              |

| Num.  | CAS | Name                                                                                                                                                    | Retrieval<br>Source | Retrieved<br>Structure | LLM<br>Prediction                                                                                                                                                              |
|-------|-----|---------------------------------------------------------------------------------------------------------------------------------------------------------|---------------------|------------------------|--------------------------------------------------------------------------------------------------------------------------------------------------------------------------------|
|       |     | from natural oils and fats,<br>and their mono-, di- and<br>triglycerol esters<br>(branched fatty acids at<br>naturally occuring levels<br>are included) |                     |                        | Aluminum<br>propionate;<br>Ammonium<br>propionate;<br>Barium<br>propionate;<br>Calcium<br>propionate;<br>Cobalt<br>propionate;<br>Copper<br>propionate;<br>Iron<br>propionate; |
| 17047 | —   | All salts of Al, NH4, Ba,<br>Ca, Co, Cu, Fe, Li, Mg,<br>Mn, K, Na, and Zn of<br>Propionic acid                                                          | None                | Not<br>retrieved       |                                                                                                                                                                                |

| Num.  | CAS | Name                                        | Retrieval<br>Source | Retrieved<br>Structure | LLM<br>Prediction                        |
|-------|-----|---------------------------------------------|---------------------|------------------------|------------------------------------------|
|       |     |                                             |                     |                        | Lithium                                  |
|       |     |                                             |                     |                        | propionate;                              |
|       |     |                                             |                     |                        | Magnesium                                |
|       |     |                                             |                     |                        | propionate;                              |
|       |     |                                             |                     |                        | Manganese                                |
|       |     |                                             |                     |                        | propionate;                              |
|       |     |                                             |                     |                        | Potassium                                |
|       |     |                                             |                     |                        | propionate;                              |
|       |     |                                             |                     |                        | Sodium                                   |
|       |     |                                             |                     |                        | propionate;                              |
|       |     |                                             |                     |                        | Zinc                                     |
|       |     |                                             |                     |                        | propionate                               |
| 17176 | —   | trialkyl acetic acid (C7-C17), vinyl esters | None                | Not<br>retrieved       | trialkyl acetic<br>acid;<br>vinyl esters |
|       |     | Reaction mass of                            |                     |                        | Bis(1,2,2,6,6-                           |
|       |     | Bis(1,2,2,6,6-                              |                     |                        | pentamethyl-4-                           |
| 17196 | —   | pentamethyl-4-piperidyl)                    | None                | Not<br>retrieved       | piperidyl)                               |
|       |     | sebacate and Methyl                         |                     |                        | sebacate;                                |
|       |     | 1,2,2,6,6-pentamethyl-4-                    |                     |                        | Methyl                                   |

| Num.  | CAS | Name                                                                                                                                 | Retrieval<br>Source | Retrieved<br>Structure | LLM<br>Prediction                                                                                 |
|-------|-----|--------------------------------------------------------------------------------------------------------------------------------------|---------------------|------------------------|---------------------------------------------------------------------------------------------------|
|       |     | piperidyl sebacate                                                                                                                   |                     |                        | 1,2,2,6,6-<br>pentamethyl-4-<br>piperidyl<br>sebacate<br>Silver                                   |
| 17202 | —   | SILVER CHLORIDE-<br>COATED TITANIUM<br>DIOXIDE                                                                                       | None                | Not<br>retrieved       | Chloride;<br>Titanium<br>Dioxide<br>p-t-<br>butylphenyldip                                        |
| 17408 | —   | Reaction mass of p-t-<br>butylphenyldiphenyl<br>phosphate and bis(p-t-<br>butylphenyl)phenyl<br>phosphate and triphenyl<br>phosphate | None                | Not<br>retrieved       | henyl<br>phosphate;<br>bis(p-t-<br>butylphenyl)ph<br>enyl<br>phosphate;<br>triphenyl<br>phosphate |
| 17473 | —   | All salts of Al, NH <sub>4</sub> , Ba,<br>Ca, Co, Cu, Fe, Li, Mg,                                                                    | None                | Not<br>retrieved       | Aluminum<br>octylphosphon                                                                         |



| Num. | CAS | Name                    | Retrieval<br>Source | Retrieved<br>Structure | LLM<br>Prediction                                                                                                                                                                                                          |
|------|-----|-------------------------|---------------------|------------------------|----------------------------------------------------------------------------------------------------------------------------------------------------------------------------------------------------------------------------|
|      |     | Mn, K, Na, and Zn of n- |                     |                        | ate;                                                                                                                                                                                                                       |
|      |     | Octylphosphonic acid    |                     |                        | Ammonium<br>octylphosphon<br>ate;<br>Barium<br>octylphosphon<br>ate;<br>Calcium<br>octylphosphon<br>ate;<br>Cobalt<br>octylphosphon<br>ate;<br>Copper<br>octylphosphon<br>ate;<br>Iron<br>octylphosphon<br>ate;<br>Lithium |

| Num.  | CAS | Name                                 | Retrieval<br>Source | Retrieved<br>Structure | LLM<br>Prediction                                                                                                                                                                                                      |
|-------|-----|--------------------------------------|---------------------|------------------------|------------------------------------------------------------------------------------------------------------------------------------------------------------------------------------------------------------------------|
|       |     |                                      |                     |                        | octylphosphonate;<br>Magnesium<br>octylphosphonate;<br>Manganese<br>octylphosphonate;<br>Potassium<br>octylphosphonate;<br>Sodium<br>octylphosphonate;<br>Zinc<br>octylphosphonate<br>Tetraphenylarsonium;<br>Ethylene |
| 17601 | —   | L[TPA+EG] <sub>2</sub> ;<br>[TPA+Et] | None                | Not<br>retrieved       |                                                                                                                                                                                                                        |

| Num.  | CAS | Name                                                                                                       | Retrieval<br>Source | Retrieved<br>Structure | LLM<br>Prediction |
|-------|-----|------------------------------------------------------------------------------------------------------------|---------------------|------------------------|-------------------|
| 17892 | —   | All salts of Al, NH <sub>4</sub> , Ba,<br>Ca, Co, Cu, Fe, Li, Mg,<br>Mn, K, Na, and Zn of<br>Glutaric acid | None                | Not<br>retrieved       | glycol;           |
|       |     |                                                                                                            |                     |                        | Ethanol           |
|       |     |                                                                                                            |                     |                        | Aluminum          |
|       |     |                                                                                                            |                     |                        | glutarate;        |
|       |     |                                                                                                            |                     |                        | Ammonium          |
|       |     |                                                                                                            |                     |                        | glutarate;        |
|       |     |                                                                                                            |                     |                        | Barium            |
|       |     |                                                                                                            |                     |                        | glutarate         |
|       |     |                                                                                                            |                     |                        | Calcium           |
|       |     |                                                                                                            |                     |                        | glutarate;        |
|       |     |                                                                                                            |                     |                        | Cobalt            |
|       |     |                                                                                                            |                     |                        | glutarate;        |
|       |     |                                                                                                            |                     |                        | Copper            |
|       |     |                                                                                                            |                     |                        | glutarate;        |
|       |     |                                                                                                            |                     |                        | Iron glutarate;   |
|       |     |                                                                                                            |                     |                        | Lithium           |
|       |     |                                                                                                            |                     |                        | glutarate;        |
|       |     |                                                                                                            |                     |                        | Magnesium         |
|       |     |                                                                                                            |                     |                        | glutarate;        |
|       |     |                                                                                                            |                     |                        | Manganese         |

| Num.  | CAS | Name                                                                   | Retrieval<br>Source | Retrieved<br>Structure | LLM<br>Prediction                                                                                                                                                |
|-------|-----|------------------------------------------------------------------------|---------------------|------------------------|------------------------------------------------------------------------------------------------------------------------------------------------------------------|
|       |     |                                                                        |                     |                        | glutarate;<br>Potassium<br>glutarate;<br>Sodium<br>glutarate;<br>Zinc glutarate<br>Trimethylolpropane;<br>2-ethylhexanoic acid and benzoic acid;<br>benzoic acid |
| 17980 | —   | trimethylolpropane, diester with 2-ethylhexanoic acid and benzoic acid | None                | Not retrieved          | 2-ethylhexanoic acid;<br>benzoic acid                                                                                                                            |
| 18130 | —   | End-group tributyl citrate–rosin ester plasticizer                     | None                | Not retrieved          | Tributyl Citrate;<br>Rosin Ester                                                                                                                                 |

To validate the LLM-based extraction results, each entry was assigned to one of five categories reflecting the relationship between retrieved structures and predicted components:

- 1) Correct Prediction: The LLM correctly identified the relevant components described in the name. This category contains a total of 2 entries, including the

following IDs: 16377, 16865.

- 2) **Correct Side-Chain Structure but Incorrect Overall Prediction:** The LLM captured core structural fragments (e.g., phosphoric-acid units, glycidyl groups), but the predicted list did not match the actual mixture composition. This category contains a total of 4 entries, including the following IDs: 75, 11236, 4053, 10384.
- 3) **Simplified Structure or Omitted Components:** The LLM output chemically reasonable esters or acids (e.g., phthalates, fatty-acid esters), but missed one or more documented component. This category contains a total of 3 entries, including the following IDs: 9485, 11552, 2940.
- 4) **Prediction as Reaction Components:** The LLM predicted plausible precursors or reactants rather than the final mixture described in the name. This category contains a total of 6 entries, including the following IDs: 303, 10434, 11237, 17196, 17601, 17980.
- 5) **Undeterminable or Not Found:** No authoritative structural information could be retrieved from databases due to lack of CAS numbers or insufficient naming detail. This category contains a total of 25 entries, including the following IDs: 40, 197, 1112, 5892, 8186, 8187, 9894, 11211, 11579, 11632, 12681, 12682, 1498, 16542, 16792, 16843, 17013, 17047, 17202, 17473, 17609, 17892, 18130, 17408, and 17176.

### 3. Details of ML models for predicting chemical toxicity

#### 3.1 Details of training data for ML

The details of the training data used for the ML models targeting the seven toxicity endpoints are provided below.

Table S7. Class distributions for 7 toxicity indicators.

|               | C    | M    | R    | CMR  | STOT_RE | AqTox | RespSens |
|---------------|------|------|------|------|---------|-------|----------|
| 0 (non-toxic) | 4742 | 4953 | 4613 | 4053 | 4156    | 3753  | 5247     |
| 1 (toxic)     | 835  | 624  | 964  | 1524 | 1421    | 1824  | 330      |

#### 3.2 Details of ML with multiple molecular representations

- 1) ECFP: ECFP is a circular fingerprint that encodes local structural features of a molecule based on atomic neighborhood information. A commonly used parameter setting includes a radius of 3 and a bit vector length of 2048 bits.
- 2) RDKit: RDKFP is a path-based fingerprint that encodes all atom paths within a molecule (typically paths containing 1 to 7 atoms), capturing topological features of the molecular structure. Its default bit vector length is also 2048 bits.
- 3) MACCS: MACCS is a predefined substructure-based fingerprint consisting of 166 bits, where each bit corresponds to the presence or absence of a specific chemical substructure.
- 4) ECFP+ RDKit+ MACCS+PCA: The three molecular fingerprints, when concatenated, form a 4,262-dimensional vector. Subsequently, PCA was applied to the concatenated feature matrix, and a cumulative explained variance plot was generated to determine the number of principal components required to retain 85%,

95%, and nearly 100% of the total variance. Ultimately, 2,048 principal components were selected, and the resulting reduced feature matrix was used for training the subsequent MLP model.

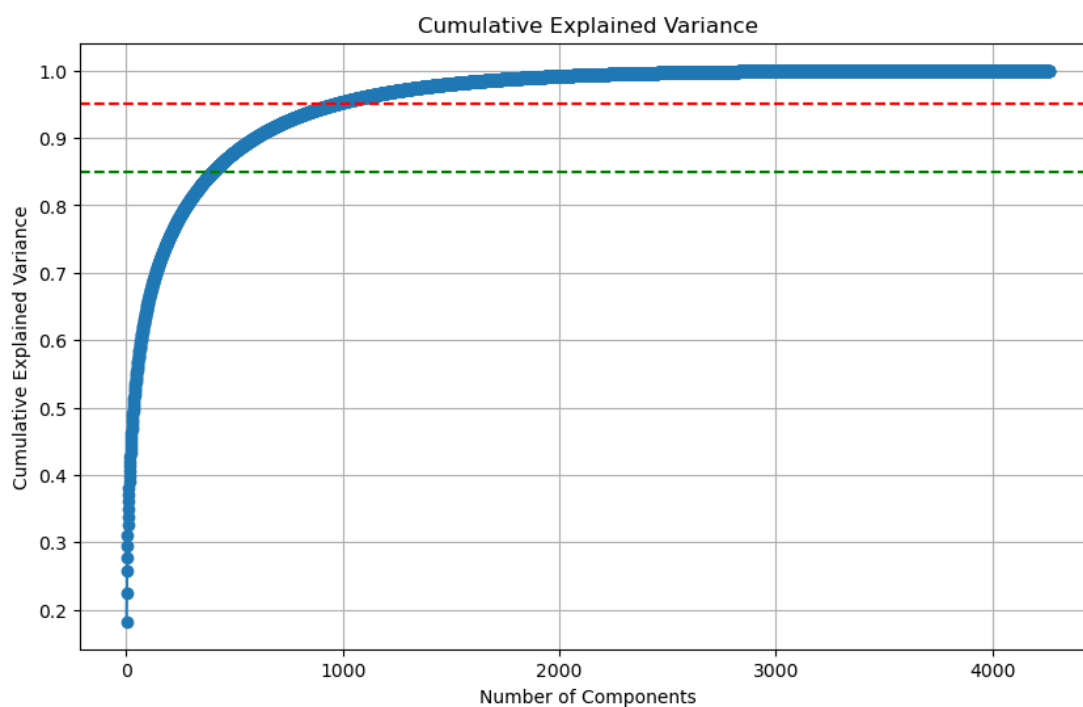

Figure S4. Cumulative explained variance curve of concatenated molecular fingerprints after PCA.

- 5) GROVER-base: molecular fingerprints generated using the base version of the GROVER model.
- 6) GROVER-large: molecular fingerprints generated using the large version of the GROVER model.
- 7) MolCLR-finetune: fine-tuning performed directly on the MolCLR model.
- 8) MolCLR-feature: hidden-layer embeddings extracted from the MolCLR model and used as molecular fingerprints.

### 3.3 Results of multi-task learning

ECFP + MACCS fingerprints were used as molecular representations. Single-task: a separate model was trained for each toxicity endpoint. Multi-task: a single model was used to simultaneously predict all endpoints. Selected indicators: to leverage potential inter-task correlations, a subset of related endpoints (C, M, R) was selected for multi-task prediction.

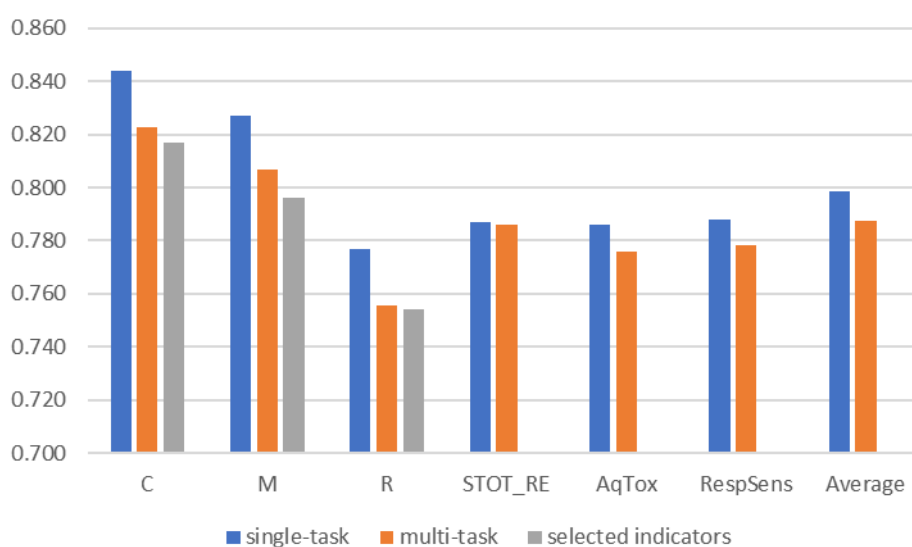

Figure S5. Comparison of multi-task learning and single-task learning performance.

### 3.4 Results of random hyperparameter optimization

ECFP/MACCS/RDKFP: whether the corresponding molecular fingerprint is used; ECFP\_n: length of the generated ECFP fingerprint; ECFP\_r: ECFP radius; betas1/betas2:  $\beta_1$  and  $\beta_2$  parameters of the Adam optimizer; dp: dropout rate; fps: choice of molecular representation (fingerprints or features generated by GROVER-base or GROVER-large); gamma:  $\gamma$  parameter of the learning rate scheduler; h1/h2: dimensions of the two hidden layers; lr: learning rate; momentum: momentum



parameter for the SGD optimizer; op: selected optimizer; schedule: whether to apply a learning rate schedule; step\_size: step size parameter of the learning rate scheduler.

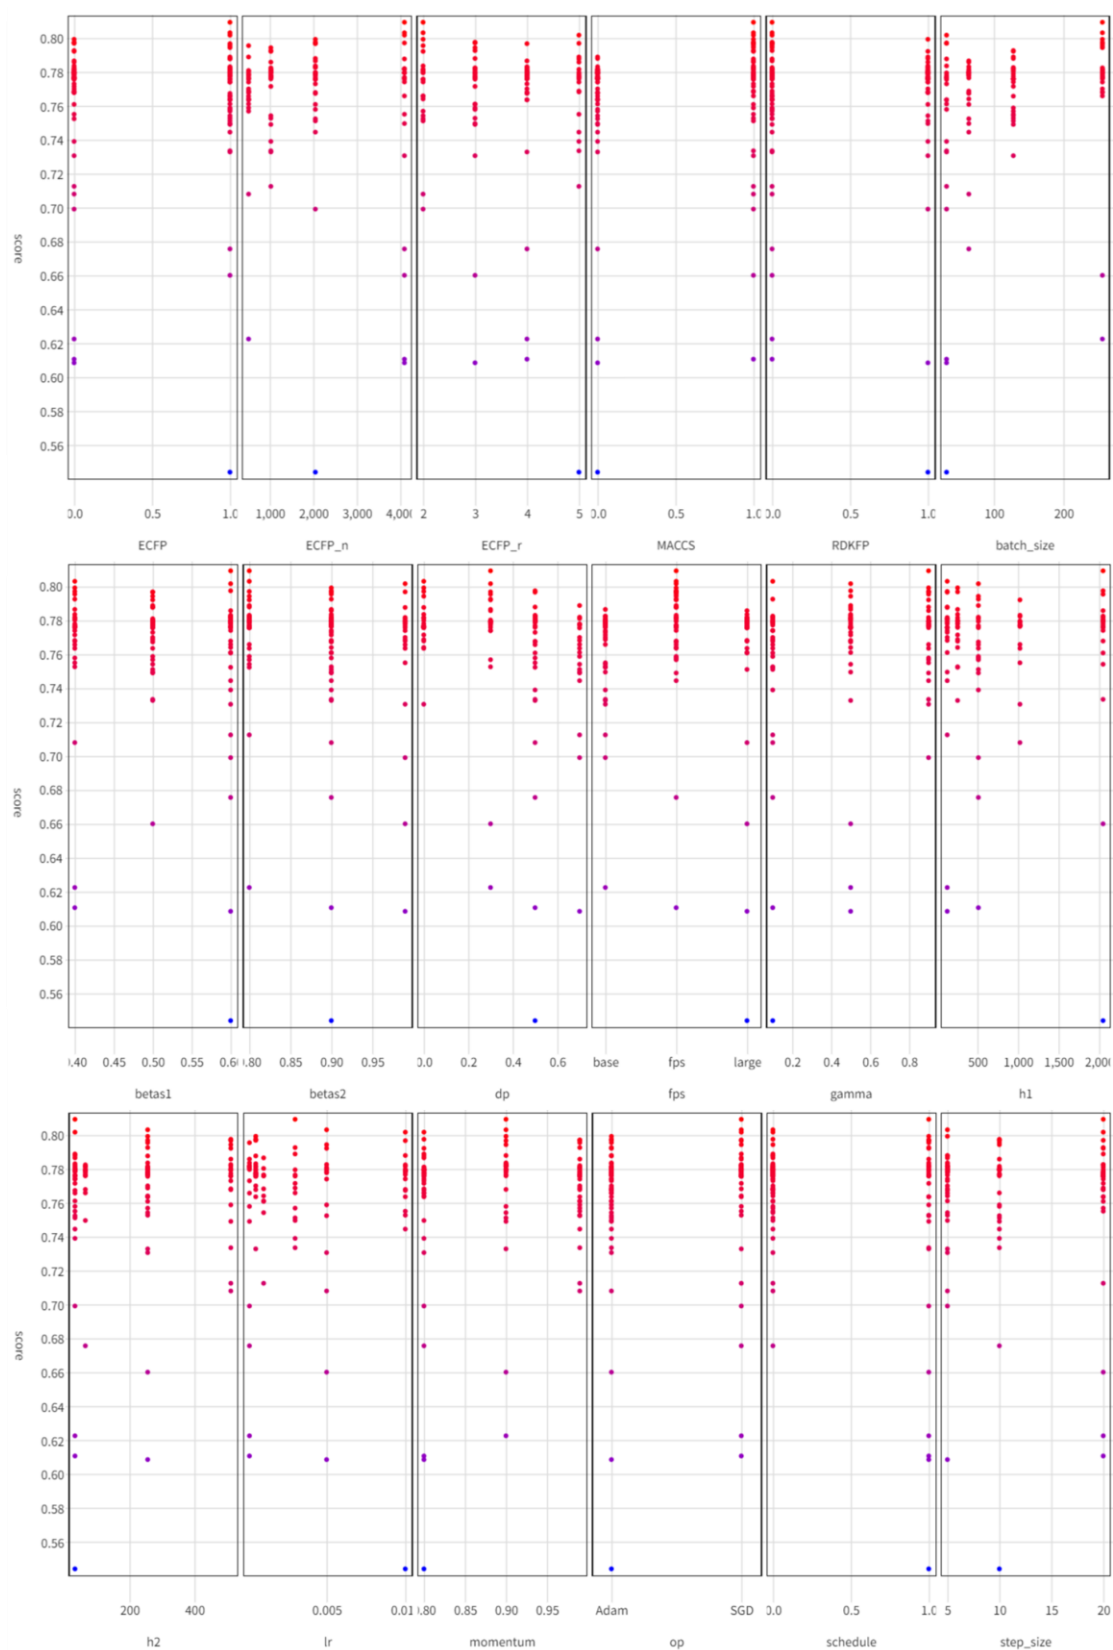

Figure S6. Results of random hyperparameter optimization.

### 3.5 Results of predictive performance of ML models

The classification accuracies of ML models under different training strategies are summarized below.

Table S8. Toxicity prediction results using different molecular representations.

|                        | CMR   | C     | M     | R     | STOT<br>_RE | AqTox | RespS<br>ens | Avera<br>ge |
|------------------------|-------|-------|-------|-------|-------------|-------|--------------|-------------|
| ECFP+R                 |       |       |       |       |             |       |              |             |
| DKFP+<br>MACCS<br>+PCA | 0.792 | 0.852 | 0.825 | 0.784 | 0.792       | 0.787 | 0.789        | 0.803       |
| ECFP+R                 |       |       |       |       |             |       |              |             |
| DKFP+<br>MACCS         | 0.788 | 0.849 | 0.822 | 0.775 | 0.796       | 0.790 | 0.786        | 0.801       |
| ECFP+<br>MACCS         | 0.781 | 0.844 | 0.827 | 0.777 | 0.787       | 0.786 | 0.788        | 0.799       |
| RDKFP+<br>MACCS        | 0.784 | 0.844 | 0.819 | 0.783 | 0.790       | 0.781 | 0.779        | 0.797       |
| MACCS                  | 0.772 | 0.831 | 0.827 | 0.768 | 0.792       | 0.791 | 0.777        | 0.794       |
| ECFP                   | 0.751 | 0.815 | 0.800 | 0.752 | 0.767       | 0.761 | 0.764        | 0.773       |
| RDKFP                  | 0.773 | 0.823 | 0.799 | 0.769 | 0.779       | 0.757 | 0.766        | 0.781       |
| GROVE<br>R-base        | 0.770 | 0.819 | 0.798 | 0.756 | 0.778       | 0.783 | 0.770        | 0.782       |
| GROVE<br>R-large       | 0.771 | 0.826 | 0.797 | 0.763 | 0.787       | 0.780 | 0.781        | 0.786       |
| MolCLR<br>-finetune    | 0.764 | 0.825 | 0.807 | 0.760 | 0.772       | 0.778 | 0.787        | 0.785       |
| MolCLR<br>-feature     | 0.597 | 0.664 | 0.615 | 0.596 | 0.649       | 0.625 | 0.667        | 0.630       |

The following summarizes the validation results of the ML model.

Table S9. Model performance on the final train/validation/test split.

|       | CMR   | C     | M     | R     | STOT<br>_RE | AqTox | RespS<br>ens | Avera<br>ge |
|-------|-------|-------|-------|-------|-------------|-------|--------------|-------------|
| Valid | 0.790 | 0.852 | 0.821 | 0.796 | 0.795       | 0.780 | 0.783        | 0.802       |

|      |       |       |       |       |       |       |       |       |
|------|-------|-------|-------|-------|-------|-------|-------|-------|
| AUC  |       |       |       |       |       |       |       |       |
| Test |       |       |       |       |       |       |       |       |
| AUC  | 0.762 | 0.842 | 0.784 | 0.729 | 0.783 | 0.775 | 0.840 | 0.788 |

### 3.6 Substructure-level enrichment analysis

In each enrichment plot, the x-axis represents  $\log_{10}(\text{OR})$ , which reflects the strength and direction of the association between a substructure and toxicity (values greater than zero indicate positive enrichment, whereas values below zero indicate negative enrichment). The y-axis denotes the frequency of the substructure in the dataset. For clarity, only substructures exhibiting high-confidence associations are displayed, defined as those with q-values (false discovery rate-adjusted p-value, using the Benjamini–Hochberg correction) below 0.05 and odds ratios greater than 2. To highlight the most informative patterns, four representative substructures are emphasized in each panel by visually marking their occurrences on example molecules. These include the two substructures with the highest odds ratios, which likely represent the strongest toxicity-associated features, as well as the two most frequently occurring substructures among those with odds ratios above 2, which signify commonly appearing features that may contribute to potential toxicity risks. Together, these highlighted substructures provide meaningful mechanistic clues for future toxicological investigations.

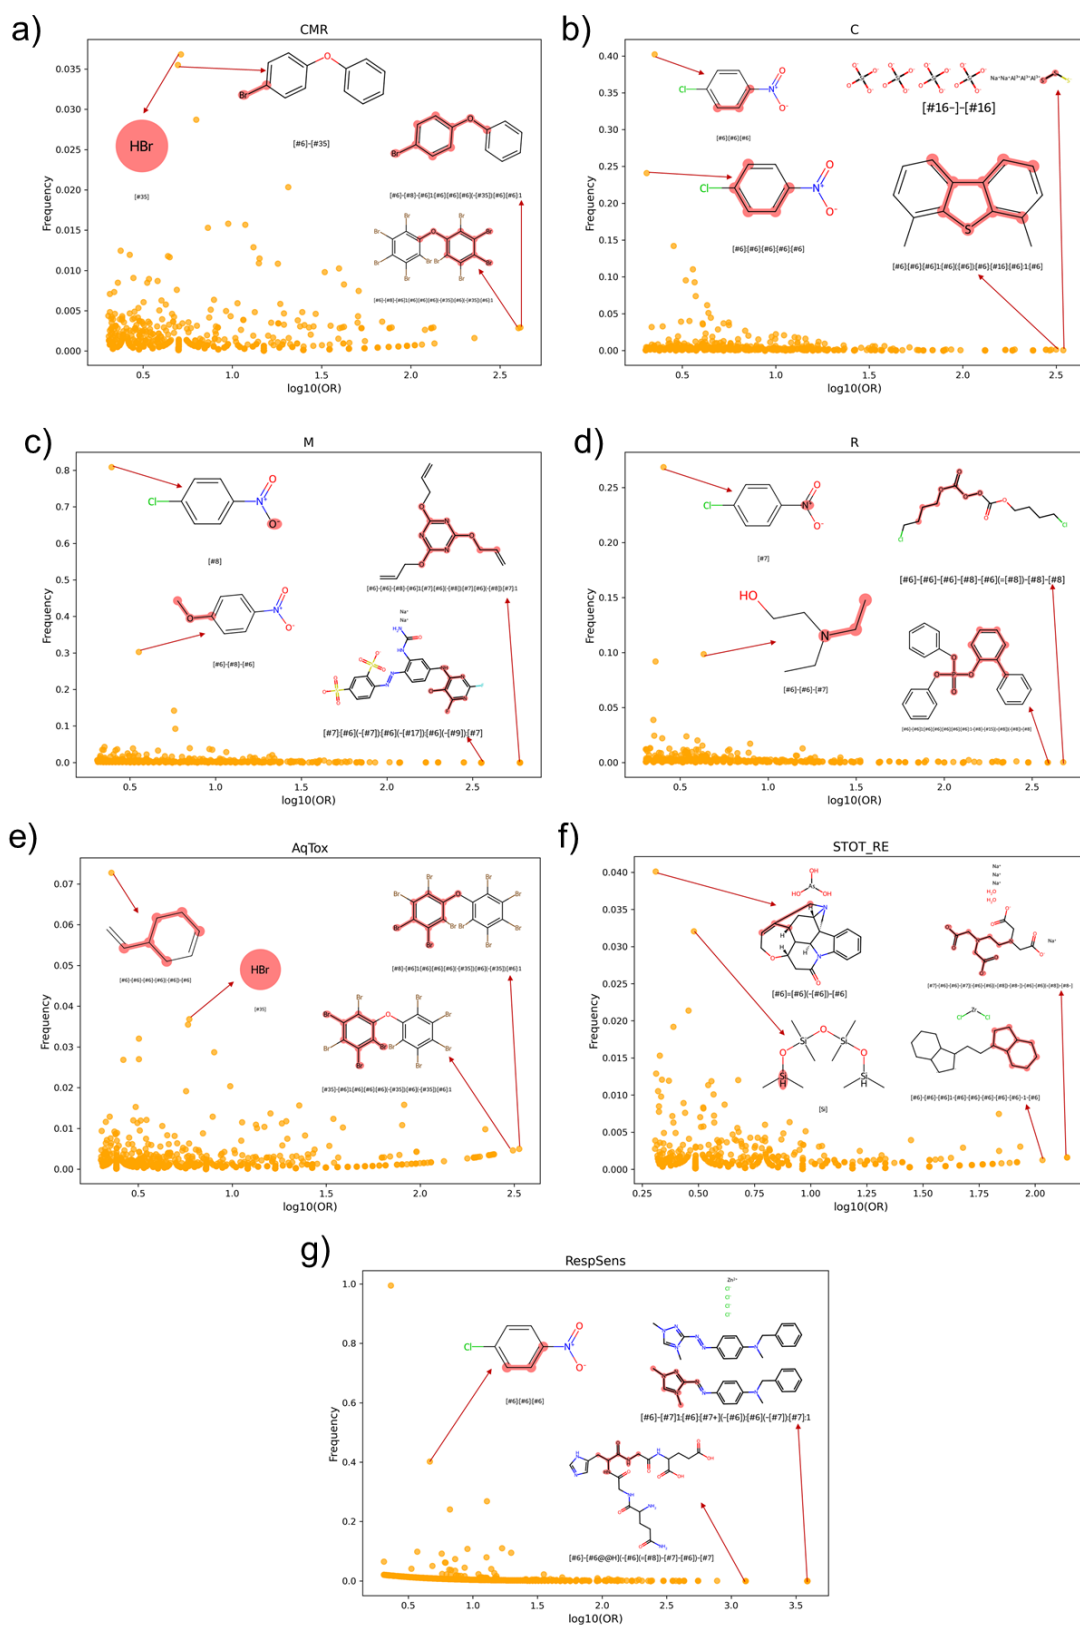

Figure S7. Results of substructure-level enrichment analysis.

### 3.7 Linking molecular structure-based results to the AOP framework and OECD test guidelines

According to the AOP framework, toxic action can be abstracted as a sequence of molecular structure – molecular initiating event (MIE) – key events (KEs) – adverse outcome (AO) [9,10, 30]. We summarize below the AOP knowledge relevant to the seven toxicity endpoints used in this study, based on the information curated in the AOP-Wiki [11-19].

Table S10. MIE, KE, and AO information of toxicity endpoint (C).

| Type |                                          |
|------|------------------------------------------|
| MIE  | <u>Increase, Oxidative DNA damage</u>    |
| KE   | <u>Inadequate DNA repair</u>             |
| KE   | <u>Increase, DNA strand breaks</u>       |
| AO   | <u>Increase, Mutations</u>               |
| AO   | <u>Increase, Chromosomal aberrations</u> |

Table S11. MIE, KE, and AO information of toxicity endpoint (M).

| Type |                                            |
|------|--------------------------------------------|
| MIE  | Alkylation, DNA                            |
| KE   | Inadequate DNA repair                      |
| KE   | Increase, Mutations                        |
| AO   | Increase, Heritable mutations in offspring |

Table S12. MIE, KE, and AO information of toxicity endpoint (R).

| Type |  |
|------|--|
|------|--|

|     |                                                                        |
|-----|------------------------------------------------------------------------|
| MIE | Estrogen receptor activation in mammary gland stromal/epithelial cells |
| KE  | Altered transcription in mammary cells                                 |
| KE  | Epigenetic alterations in mammary tissue                               |
| KE  | Altered cellular differentiation of mammary epithelial cells           |
| KE  | Increased collagen deposition in mammary stroma                        |
| KE  | Increased proliferation of mammary epithelial cells                    |
| KE  | Altered apoptosis of mammary cells                                     |
| KE  | Altered progesterone receptor signaling                                |
| KE  | Dedifferentiation of mammary epithelial cells                          |
| KE  | Disrupted tensional homeostasis in mammary tissue                      |
| KE  | Desmoplasia in mammary gland stroma                                    |
| KE  | Altered fat pad maturation in the mammary gland                        |
| KE  | Chronic inflammation in mammary tissue                                 |
| KE  | Increased migration of mammary epithelial/stromal cells                |
| KE  | Increased invasion of mammary epithelial cells                         |
| KE  | Increased mammary gland/breast density                                 |
| KE  | Altered morphogenesis of the mammary gland                             |
| KE  | Altered hormone sensitivity of the mammary gland                       |
| KE  | Hyperplasia of mammary epithelium                                      |
| AO  | Enhanced risk for cancer in mammary gland (breast cancer)              |

Table S13. MIE, KE, and AO information of toxicity endpoint (STOT\_RE, OECD Test No. 407).

| Type |                                 |
|------|---------------------------------|
| MIE  | Alkylation, Protein             |
| KE   | Increase, Cell injury/death     |
| KE   | Tissue resident cell activation |

|    |                                      |
|----|--------------------------------------|
| KE | Increased Pro-inflammatory mediators |
| KE | Activation, Stellate cells           |
| KE | Accumulation, Collagen               |
| AO | N/A, Liver fibrosis                  |

Table S14. MIE, KE, and AO information of toxicity endpoint (STOT\_RE, OECD Test No. 408).

| Type |                                                                  |
|------|------------------------------------------------------------------|
| MIE  | Inhibition, Bile Salt Export Pump (ABCB11)                       |
| KE   | Activation of specific nuclear receptors, Transcriptional change |
| KE   | Bile accumulation, Pathological condition                        |
| KE   | Release, Cytokine                                                |
| KE   | Increase, Inflammation                                           |
| KE   | Increase, Reactive oxygen species                                |
| KE   | Peptide Oxidation                                                |
| AO   | Cholestasis, Pathology                                           |

Table S15. MIE, KE, and AO information of toxicity endpoint (AqTox, AOP312).

| Type |                                        |
|------|----------------------------------------|
| MIE  | Acetylcholinesterase (AChE) Inhibition |
| KE   | Acetylcholine accumulation in synapses |
| KE   | Increased Cholinergic Signaling        |
| KE   | Impaired coordination and movement     |
| AO   | Increased Mortality                    |
| AO   | Decrease, Population growth rate       |

Table S16. MIE, KE, and AO information of toxicity endpoint (AqTox, AOP312).

| Type |  |
|------|--|
|------|--|

|     |                                                  |
|-----|--------------------------------------------------|
| MIE | Binding of plastoquinone B (QB), PSII antagonism |
| KE  | Decrease, Photosynthesis                         |
| KE  | Decrease, Coupling of oxidative phosphorylation  |
| KE  | Decrease, Adenosine triphosphate pool            |
| KE  | Decrease, Cell proliferation                     |
| AO  | Decrease, Growth                                 |

Table S17. MIE, KE, and AO information of toxicity endpoint (RespSens).

| Type |                                                          |
|------|----------------------------------------------------------|
| MIE  | Covalent Binding, Protein                                |
| KE   | Increased, secretion of proinflammatory mediators        |
| KE   | Activation, Dendritic Cells                              |
| KE   | Activation/Proliferation, T-cells                        |
| AO   | Increase, Allergic Respiratory Hypersensitivity Response |

Each model endpoint can be mapped to specific traditional toxicological tests. Carcinogenicity corresponds to 18–24 month chronic feeding carcinogenicity studies in rats or mice, in which tumour formation is monitored <sup>[20]</sup>. Mutagenicity corresponds to in vitro mammalian cell micronucleus tests that detect chromosomal aberrations <sup>[21]</sup>. Reproductive toxicity corresponds to short-term reproductive/developmental toxicity screening studies in rats, where animals are dosed from pre-mating through mating, gestation and early lactation, and parental reproductive performance and early offspring development are observed <sup>[22]</sup>. STOT\_RE\_Toxicity\_Prediction corresponds to 28-day and 90-day repeated-dose oral toxicity studies in rodents, which jointly evaluate multiple organ systems including liver, kidney, haematology, nervous and immune systems, body weight and pathology <sup>[23,24]</sup>. AqTox\_Toxicity\_Prediction corresponds to



classical aquatic toxicity tests: 96-h acute fish toxicity tests (e.g. with zebrafish or rainbow trout, recording mortality at 24/48/72/96 h and determining the  $LC_{50}$ ), 24–48 h *Daphnia* acute immobilisation tests to determine the  $EC_{50}$  for impaired mobility, and 72-h freshwater algae and cyanobacteria growth inhibition tests to determine  $EC_{50}$  values <sup>[25-27]</sup>.RespSens\_Toxicity\_Prediction is informed by air–liquid interface (ALI) models of human bronchial/airway epithelial cells: cells are grown to confluence on porous membranes, the apical medium is removed so that the apical surface is exposed to air while the basolateral surface remains in contact with culture medium, and test substances are applied as aerosols or gases directly onto the cells, followed by determination of  $IC_{50}$  values or related cytotoxicity/inflammation endpoints <sup>[28,29]</sup>.

#### 4. Details of fuzzy search method for predicting functional labels

#### 4.1 Results of “conserved sequences”

Among the manually labeled data, only one entry could not be assigned a third-level functional property label suitable for conserved sequence calculation. In addition, major categories without defined subcategories typically exhibit mixed structural features and were therefore excluded from conserved sequence analysis. The conserved sequence results for the remaining third-level functional labels are summarized below.

Table S18. Common sequence of third-level functional labels.

[illegible]

[illegible]

[illegible]

[illegible]

[illegible]

[illegible]

[illegible]



[illegible]

## 4.2 Similarity scores for third-level functional property labels

Figure S4 displays the structural similarity distribution map for each functional subcategory. Each bubble represents a specific chemical subclass, with the y-axis indicating the consistency in shared structures with existing functional categories (Jaccard similarity). The size of each bubble corresponds to the number of chemicals in that subclass with high structural consistency. For example, classes such as itaconic acid esters, organic secondary stabilizers, and hindered phenolics are concentrated in the similarity range of 0.92–0.98, indicating high similarity with the conserved sequences of known functional labels. In contrast, subclasses with more diverse structures or ambiguous functional boundaries, such as thioether and fatty acid derivatives, show relatively lower similarity and are more widely dispersed.

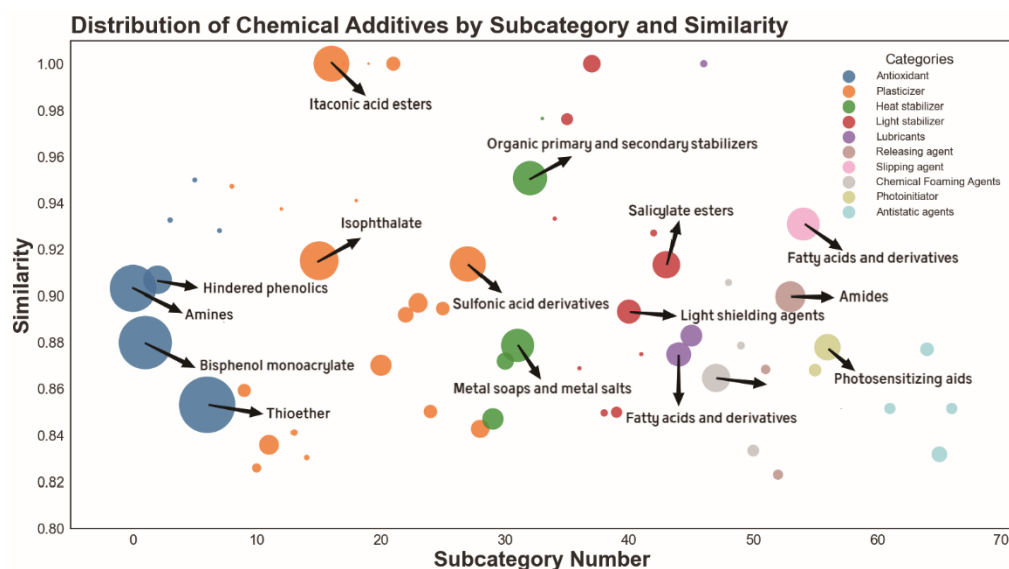

Figure S8. Bubble plot of the distribution of similarity scores among third-level functional labels.

### 4.3 Manual validation of fuzzy-search functional predictions

In the manual verification results of the fuzzy search, 15 samples were scored 1, 6 samples were scored 0.5, and 19 samples were scored 0.

Table S19. Sampling manual verification results of fuzzy search.

| Num | CAS      | Name                       | Predicted category | Predicted subcategory | Score | Evidence summary                                                                                                                               | source |
|-----|----------|----------------------------|--------------------|-----------------------|-------|------------------------------------------------------------------------------------------------------------------------------------------------|--------|
| 0   | 100-00-5 | Benzene, 1-chloro-4-nitro- | Releasing agent    | amides                | 0     | Databases such as PubChem/HSDB describe 1-chloro-4-nitrobenzene as an intermediate for dyes, pesticides, rubber chemicals and pharmaceuticals. |        |
| 1   | 100-01-6 | Benzenamine, 4-nitro-      | Releasing agent    | amides                | 0     | PubChem/HSDB list 4-nitroaniline as an intermediate for dyes, pharmaceuticals                                                                  |        |

| Num | CAS      | Name                              | Predicted category | Predicted subcategory | Score | Evidence source summary                                                                                                                             |
|-----|----------|-----------------------------------|--------------------|-----------------------|-------|-----------------------------------------------------------------------------------------------------------------------------------------------------|
| 3   | 100-20-9 | 1,4-Benzenedi carbonyl dichloride | Antioxidant        | Phosphite             | 0     | and pesticides.<br>PubChem and catalogues identify terephthaloyl chloride as a monomer for polyesters and aramids.                                  |
|     |          |                                   |                    |                       |       | PubChem and industrial catalogues mainly list benzaldehyde as a fragrance and chemical intermediate, with occasional mention as solvent/plasticizer |
|     |          |                                   |                    |                       |       |                                                                                                                                                     |
| 7   | 100-52-7 | Benzaldehyde                      | Plasticizer        | terephthalates        | 0     |                                                                                                                                                     |

| Num | CAS      | Name                                       | Predicted category | Predicted subcategory | Score | Evidence source summary                                                                                       |
|-----|----------|--------------------------------------------|--------------------|-----------------------|-------|---------------------------------------------------------------------------------------------------------------|
| 9   | 100-68-5 | Benzenamine, 2,4-dichloro-                 | Antioxidant        | Aromatic amines       | 0     | ng aid.<br>PubChem/Wikipedia: 2,4-dichloroaniline is a dye and agrochemical intermediate.                     |
| 20  | 101-77-9 | Benzene, 1,1'-methylene bis[4-isocyanato-] | Crosslinking agent | isocyanates           | 0     | Literature and handbooks: 4,4'-methylenedianiline is used to produce MDI and curing agents for polyurethanes. |
| 28  | 101-84-8 | Diphenyl ether                             | Heat stabilizer    | metallic soaps        | 0     | PubChem/HSDB describe diphenyl ether as solvent, heat-transfer fluid and fragrance carrier.                   |

| Num | CAS      | Name                           | Predicted category | Predicted subcategory | Score | Evidence source summary                                                                                    |
|-----|----------|--------------------------------|--------------------|-----------------------|-------|------------------------------------------------------------------------------------------------------------|
| 36  | 102-50-1 | Benzene, 1-chloro-2,4-dinitro- | Antimicrobial      | organic               | 0.5   | PubChem/chemical handbooks: 1-chloro-2,4-dinitrobenzene is mainly an intermediate for dyes and pesticides. |
| 55  | 104-31-4 | Benzaldehyde, 4-methyl-        | Antioxidant        | Hindered phenolics    | 0     | PubChem/Wikipedia: CAS 104-31-4 corresponds to benzonatate, a cough suppressant.                           |
| 73  | 106-47-8 | Benzenamine, 4-chloro-         | Colorants          | azo dyes              | 0     | PubChem/Wikipedia: 4-chloroaniline is used as an intermediate for dyes,                                    |

| Num | CAS      | Name                       | Predicted category       | Predicted subcategory | Score | Evidence source summary                                                                                    |
|-----|----------|----------------------------|--------------------------|-----------------------|-------|------------------------------------------------------------------------------------------------------------|
| 82  | 108-03-2 | Propanamide, N,N-dimethyl- | Anti-sticking agent      | amides                | 0     | pharmaceuticals and pesticides. PubChem lists N,N-dimethylpropanamide as solvent and organic intermediate. |
| 91  | 108-44-1 | Benzenamine, 2,4-dimethyl- | Slipping agent           | fatty acids           | 0     | PubChem: 2,4-dimethylaniline is a dye and pesticide intermediate.                                          |
| 103 | 109-00-2 | 2-Pyridinecarbonitrile     | Polymerization inhibitor | phenols               | 0     | PubChem: 2-cyanopyridine is used to produce nicotinamide and other compounds.                              |
| 156 | 115-77-5 | Pentaerythritol            | Curing agents and        | polyols               | 1     | PubChem and coating/resin                                                                                  |

| Num | CAS      | Name                | Predicted category | Predicted subcategory | Score | Evidence source summary                                                |
|-----|----------|---------------------|--------------------|-----------------------|-------|------------------------------------------------------------------------|
|     |          |                     | curing             |                       |       | literature                                                             |
|     |          |                     | accelerator        |                       |       | describe                                                               |
|     |          |                     | s                  |                       |       | pentaerythritol as a typical polyol for alkyd and polyurethane resins. |
|     |          |                     |                    |                       |       | PubChem/pharm                                                          |
|     |          |                     |                    |                       |       | acopoeia:                                                              |
|     |          |                     |                    |                       |       | phloroglucinol is a                                                    |
| 172 | 119-47-1 | Benzene-1,3,5-triol | Antioxidant        | polyphenols           | 1     | polyhydroxybenzene with antioxidant and pharmacological activity.      |
|     |          |                     |                    |                       |       | PubChem/produc                                                         |
| 203 | 123-33-1 | 2,4-Pentanedione    | Acid binding agent | chelating             | 1     | t sheets: 2,4-pentanedione and analogues are                           |



| Num | CAS      | Name                         | Predicted category | Predicted subcategory | Score | Evidence source summary                                                                                                                                                |
|-----|----------|------------------------------|--------------------|-----------------------|-------|------------------------------------------------------------------------------------------------------------------------------------------------------------------------|
| 337 | 131-11-3 | Phthalic acid, diethyl ester | Plasticizer        | terephthalates        | 1     | widely used as metal chelating agents and catalyst ligands.<br>PubChem/handbooks: diethyl (or dimethyl) phthalate is a phthalate plasticizer for cellulose esters etc. |
| 356 | 133-14-2 | Naphthalene, 1-chloro-2-     | Light stabilizer   | benzophenones         | 0     | PubChem: 1-chloro-2-naphthol is recorded as an intermediate for dyes and other fine chemicals.                                                                         |
| 368 | 133-     | 9H-                          | Photoinitiator     | thioxanthones         | 1     | PubChem/photoinitiators                                                                                                                                                |

| Num | CAS      | Name                         | Predicted category | Predicted subcategory | Score | Evidence source summary                                                                                                                                                                                                                                                                  |
|-----|----------|------------------------------|--------------------|-----------------------|-------|------------------------------------------------------------------------------------------------------------------------------------------------------------------------------------------------------------------------------------------------------------------------------------------|
| 487 | 70-4     | Thioxanth                    | tor                | es                    | 0     | <p>initiator literature: thioxanthone is widely used as a UV-curing photoinitiator.</p> <p>PubChem/SDS: ethanolamine is used as absorbent, pH adjuster and surfactant raw material.</p> <p>PubChem/pigme</p> <p>nt handbooks: copper</p> <p>phthalocyanine is a common blue pigment.</p> |
|     | 141-43-5 | Ethanolam<br>ine             | coupling<br>agent  | silanes               |       |                                                                                                                                                                                                                                                                                          |
| 514 | 147-14-8 | Copper<br>phthalocya<br>nine | Colorants          | phthalocyan<br>ines   | 1     |                                                                                                                                                                                                                                                                                          |
| 689 | 1975-78- | Benzoic<br>acid, 2-          | Antioxida<br>nt    | Aromatic<br>amines    | 0     | <p>Product information: 2-</p>                                                                                                                                                                                                                                                           |

| Num | CAS   | Name                             | Predicted category | Predicted subcategory | Score | Evidence source summary                                                                                                      |
|-----|-------|----------------------------------|--------------------|-----------------------|-------|------------------------------------------------------------------------------------------------------------------------------|
| 703 | 6     | ethoxy-                          | coupling agent     | silanes               | 1     | ethoxybenzoic acid is sold as an organic intermediate.                                                                       |
|     | 2034  | Silane, methyltri                |                    |                       |       | Silane supplier datasheets: methyltrimethoxysilane is listed as organofunctional silane used as coupling/crosslinking agent. |
| 903 | -26-6 | methoxy-                         | coupling agent     | silanes               | 1     | Technical datasheets: 3-glycidoxypolytrimethoxysilane (GPTMS) is a typical epoxy-functional silane coupling agent.           |
|     | 2530  | Glycidoxy propyltrimethoxysilane |                    |                       |       |                                                                                                                              |

| Num  | CAS       | Name                     | Predicted category  | Predicted subcategory | Score | Evidence source summary                                       |
|------|-----------|--------------------------|---------------------|-----------------------|-------|---------------------------------------------------------------|
|      |           | 1,4-                     |                     |                       |       | Limited information: 1,4-                                     |
| 1102 | 2991-28-6 | Benzenediol, monoacetate | Heat stabilizer     | metallic soaps        | 0.5   | benzenediol monoacetate is listed as an organic intermediate. |
|      |           |                          |                     |                       |       | Product catalogues list N-                                    |
| 1766 | 4316-66-3 | Propanamide, N-butyl-    | Anti-sticking agent | amides                | 0     | butylpropanamide as an organic intermediate.                  |
|      |           |                          |                     |                       |       | Product catalogues sell N-                                    |
| 2205 | 5528-86-1 | Benzamide, N-methyl-     | Anti-sticking agent | amides                | 0     | methylbenzamide as organic intermediate.                      |
| 3100 | 6/5/9011  | Formaldehyde polymer     | Impact Modifiers    | methacrylates         | 0     | Information on this “formaldehyde                             |

| Num  | CAS         | Name                             | Predicted category                    | Predicted subcategory | Score | Evidence source summary                                                                               |
|------|-------------|----------------------------------|---------------------------------------|-----------------------|-------|-------------------------------------------------------------------------------------------------------|
|      |             |                                  |                                       |                       |       | polymer” entry is scarce and unspecific.                                                              |
|      |             |                                  |                                       |                       |       | Literature and product data: 9-nitroanthracene can be used as photosensitizer or intermediate.        |
| 3210 | 91-68-9     | Anthracene, 9-nitro-             | Photoinitiator                        | benzophenones         | 0.5   | Resin/coating literature:                                                                             |
| 4330 | 1222-98-6   | Bis(hydroxymethyl)propionic acid | Curing agents and curing accelerators | polyols               | 1     | bis(hydroxymethyl)propionic acid is widely used as branching polyol for polyurethanes and polyesters. |
| 6050 | 6855-5-77-1 | Fatty acids, tall-oil,           | Heat stabilizer                       | metallic soaps        | 1     | Product datasheets: tall-oil fatty acids,                                                             |

| Num  | CAS         | Name                           | Predicted category | Predicted subcategory | Score | Evidence source summary                                                                             |
|------|-------------|--------------------------------|--------------------|-----------------------|-------|-----------------------------------------------------------------------------------------------------|
|      |             | magnesium salts                |                    |                       |       | magnesium salts are considered metallic soaps used for lubrication/stabilization.                   |
| 6112 | 68610-51-5  | Alcohols, C12-14               | Slipping agent     | fatty acids           | 1     | Surfactant references: C12–14 alcohols are fatty alcohols used in surfactants and lubricating aids. |
| 7151 | 125643-61-0 | Phosphorous acid, mixed esters | Antioxidant        | Phosphite             | 1     | Antioxidant product information: phosphorous acid mixed esters are commonly used as phosphite       |

| Num   | CAS                 | Name                 | Predicted category   | Predicted subcategory | Score | Evidence source summary                                                                                                                                                                                                                                                            |
|-------|---------------------|----------------------|----------------------|-----------------------|-------|------------------------------------------------------------------------------------------------------------------------------------------------------------------------------------------------------------------------------------------------------------------------------------|
|       |                     |                      |                      |                       |       | secondary antioxidants. UV absorber datasheets: triazine-type UV absorbers are widely used for polymer light stabilization. Polymer literature: poly(acrylic acid) and its esters can act as tackifiers and toughening modifiers. Supplier datasheets: polybutene is often used as |
| 7230  | 1269<br>51-<br>57-7 | Triazine derivative  | Ultraviolet absorber | triazines             | 1     |                                                                                                                                                                                                                                                                                    |
| 11120 | 2585<br>2-<br>47-5  | Acrylic acid polymer | Impact Modifiers     | methacrylates         | 1     |                                                                                                                                                                                                                                                                                    |
| 14020 | 9003<br>-29-<br>6   | Polybutene           | Plasticizer          | aliphatic esters      | 0.5   |                                                                                                                                                                                                                                                                                    |

| Num   | CAS          | Name            | Predicted category | Predicted subcategory | Score | Evidence source summary                                                                                                                                                                                                                              |
|-------|--------------|-----------------|--------------------|-----------------------|-------|------------------------------------------------------------------------------------------------------------------------------------------------------------------------------------------------------------------------------------------------------|
| 15440 | 9002-88-4    | Polyethylene    | Nucleator          | talc                  | 0     | plasticizer, viscosity modifier and tackifier. Polymer handbooks: polyethylene is one of the most common commodity plastics. Resin supplier information: polyamide resins are typically used as film-forming resins or binders in coatings and inks. |
| 17533 | 1315-45-97-2 | Polyamide resin | Releasing agent    | amides                | 0.5   |                                                                                                                                                                                                                                                      |
| 18952 | 7732         | Water           | Chemical           | water-based           | 1     | Polyurethane                                                                                                                                                                                                                                         |



| Num   | CAS  | Name      | Predicted category | Predicted subcategory | Score | Evidence source summary                                                                                   |
|-------|------|-----------|--------------------|-----------------------|-------|-----------------------------------------------------------------------------------------------------------|
|       | -18- |           | Foaming            |                       |       | foaming                                                                                                   |
|       | 5    |           | Agents             |                       |       | literature: water reacts with isocyanates to generate CO <sub>2</sub> and acts as chemical blowing agent. |
|       |      |           |                    |                       |       | Rubber/plastics handbooks: styrene–                                                                       |
|       | 9003 | Styrene-  | Anti-              |                       |       | butadiene                                                                                                 |
| 19300 | -55- | butadiene | sticking           | elastomers            | 0.5   | copolymer is an elastomer used in                                                                         |
|       | 8    | copolymer | agent              |                       |       | tyres and modified                                                                                        |
|       |      |           |                    |                       |       | asphalts.                                                                                                 |

## 5. Details of exact search method for predicting functional labels

### 5.1 Details of SMARTS pattern

The SMARTS patterns applied to each plasticizer subclass supported by exact search is provided below.

#### 1) Phthalate:

First, the SMARTS pattern for phthalates is defined as ``c1cc(C(=O)O*)c(C(=O)O*)cc1``, which represents a benzene ring with two ester groups (`C(=O)O\*`) attached to the carbon atoms of the ring, consistent with the characteristic structure of phthalates. Then, the function uses the ``Chem.MolFromSmarts()`` method to convert the SMARTS pattern into a molecular pattern object and checks whether the input molecule contains the feature structure using ``mol.HasSubstructMatch()``. If a match is found, it returns True; otherwise, it returns False. If an error occurs during execution, the function catches the exception and returns False, ensuring the stability of the program.

#### 2) Terephthalate:

First, the function checks whether the input molecule is a trimellitate ester (by calling the `is_Trimellitate_ester` function). If it is, the function returns False, excluding this structure. Then, a SMARTS pattern `"c1cc(C(=O)O*)ccc1C(=O)O*"` is defined to match the terephthalate ester structure (1,4-benzenedicarboxylate diester). This pattern represents a benzene ring where two ester groups (`C(=O)O*`) are attached at the 1,4 positions, replacing the hydrogen atoms of the benzene ring. The function checks whether the input molecule matches this terephthalate ester

structure. If a match is found, it returns True; otherwise, it returns False. If any errors occur during execution, the function returns False.

### 3) Isophthalate:

First, the function checks whether the input molecule is a trimellitate ester (by calling the `is_Trimellitate_ester` function). If it is, the function returns False, excluding this structure. Then, a SMARTS pattern `"c1ccc(C(=O)O*)cc1C(=O)O*"` is defined to match the isophthalate ester structure (1,3-benzenedicarboxylate diester). This pattern represents a benzene ring where two ester groups (`C(=O)O*`) are attached at the 1,3 positions, replacing the hydrogen atoms of the benzene ring. The function checks whether the input molecule matches this isophthalate ester structure. If a match is found, it returns True; otherwise, it returns False. If any errors occur during execution, the function returns False.

### 4) Adipic Acid Esters:

First, a SMARTS pattern `"O=C(O*)CCCCC(=O)O*"` is defined to match the adipate backbone structure. This pattern represents a molecular structure with two ester groups (`C(=O)O`) attached to a five-carbon chain. The function then checks if the input molecule matches this basic structure. If it does not match, it returns False. Next, the function further excludes molecules containing closed-ring ester structures. A SMARTS pattern `"C(=O)O"` is defined to match ester groups, and the function checks whether the ester carbon is involved in a ring structure. If the ester carbon is part of a ring, it returns False. The function then continues by matching the ester groups and counting the number of ester groups attached to the ring. If at

least two ester groups are attached to the ring, the function returns False. Finally, if all conditions are met, the function returns True, indicating that the molecule is a valid adipic acid ester. If any errors occur during the process, the function returns False.

5) Azelaic Acid Esters:

First, a SMARTS pattern "O=C(O\*)CCCCCCCC(=O)O\*" is defined to match the structure of azelaic acid esters. This pattern represents a molecular structure with two ester groups (C(=O)O) attached to an eight-carbon chain. The function then checks if the input molecule matches this structure. If it does not match, it returns False. Next, the function excludes molecules containing cyclic esters or alicyclic backbones. It checks for the presence of ring atoms in the molecule, and if a ring structure is detected, it returns False. If the input molecule matches the basic structure of azelaic acid esters and does not contain a ring structure, the function returns True, indicating that the molecule is a valid azelaic acid ester. If any errors occur during the process, the function returns False.

6) Fumaric Acid Esters:

First, the function checks if the input molecule contains more than 8 atoms, as the basic structure of fumaric acid involves 8 atoms. If the number of atoms is less than or equal to 8, the function immediately returns False. Next, a SMARTS pattern "OC(=O)\C=C\C(=O)O" is defined to match the structure of fumaric acid esters. This pattern represents a structure with two ester groups (C(=O)O) and a cis double bond (\C=C) characteristic of fumaric acid. The function uses `useChirality=True`

to enforce consideration of stereochemistry, including cis/trans isomerism of the double bond, and checks whether the input molecule matches the fumaric acid ester structure. If the molecule matches this structure, it returns True; otherwise, it returns False. If any errors occur during execution, the function returns False.

7) Citric Acid Esters:

First, a SMARTS pattern "OC(=O)CC(O)(C(=O)O\*)C(C(=O)O\*)" is defined to match the structure of citric acid esters or partially esterified structures. This pattern represents a citric acid molecule with three ester groups (C(=O)O) and one hydroxyl group (OH). The function then checks if the input molecule matches this basic structure. If it matches, the function returns True, indicating that the molecule is a citric acid ester. If it does not match, the function returns False. If any errors occur during execution, the function returns False.

8) Trimellitate:

First, a SMARTS pattern "c1c(C(=O)O\*)ccc(C(=O)O\*)c1C(=O)O\*" is defined to match the structure of trimellitate esters. This pattern represents a benzene ring with three ester groups (C(=O)O) attached at the 1, 2, and 4 positions, replacing the hydrogen atoms of the benzene ring, which is characteristic of trimellitate esters. The function then checks whether the input molecule contains this structure. If a match is found, it returns True, indicating that the molecule is a trimellitate ester. If no match is found, the function returns False. If any errors occur during execution, the function returns False.

9) Itaconic Acid Esters:

First, a SMARTS pattern "O=C(O\*)CC(=C)(C(=O)O\*)" is defined to match the structure of itaconic acid esters. This pattern represents an itaconic acid ester molecule containing two ester groups (C(=O)O) and a double bond (C=C). The function then checks whether the input molecule matches this structure. If a match is found, it returns True, indicating that the molecule is an itaconic acid ester. If no match is found, the function returns False. If any errors occur during execution, the function returns False.

#### 10) Maleic Acid Esters:

First, the function checks whether the input molecule contains more than 8 atoms. If the number of atoms is less than or equal to 8, it directly returns False. Next, a SMARTS pattern "OC(=O)\C=C/C(=O)O" is defined to strictly match the structure of cis-maleic acid esters. This pattern represents a maleic acid structure with two ester groups (C(=O)O) and a cis double bond (\C=C). The function uses `useChirality=True` to enforce consideration of stereochemistry, including cis/trans isomerism of the double bond, and checks whether the input molecule matches this cis-maleic acid ester structure. If the molecule matches the structure, it returns True; otherwise, it returns False. If any errors occur during execution, the function returns False.

#### 11) Oleate:

First, a SMARTS pattern "CCCCCCCC/C=C\CCCCCCCC(=O)O\*" is defined to match the esterified form of the oleic acid group. This pattern represents a structure containing 18 carbon atoms, a double bond (C9=C10), and an ester group

(C(=O)O\*) that is characteristic of oleic acid. The function then checks whether the input molecule matches this structure. The useChirality=True option ensures that the chirality of the molecule is considered. If the molecule contains this oleate ester structure, it returns True; otherwise, it returns False. If any errors occur during execution, the function returns False.

#### 12) Sebacic Acid Esters,

First, a SMARTS pattern "O=C(O\*)CCCCCCCCC(=O)O\*" is defined to match the structure of sebacic acid esters. This pattern represents a molecule containing two ester groups (C(=O)O) attached to a nine-carbon chain. The function then checks whether the input molecule matches this basic structure. If it does not match, it returns False. Next, the function excludes molecules containing cyclic esters or alicyclic backbones. It checks for the presence of ring atoms in the molecule, and if a ring structure is detected, it returns False. If the input molecule matches the basic structure of sebacic acid esters and does not contain a ring structure, the function returns True, indicating that the molecule is a valid sebacic acid ester. If any errors occur during execution, the function returns False.

#### 13) Epoxy Derivatives

First, a SMARTS pattern "C1OC1" is defined to match the epoxide ring structure, which represents a three-membered ring containing an oxygen atom. The function checks if the input molecule contains this epoxide group structure. If it does, the function returns True. Next, another SMARTS pattern "CCCC(=O)O" is defined to match long-chain ester groups, representing a structure with an ester group

(C(=O)O) attached to a long carbon chain. The function checks if the input molecule contains this ester group structure. If it does, the function returns True, as the long carbon chain increases the molecular volume, weakens intermolecular forces, reduces material hardness, and improves flexibility. Finally, the function checks if the molecule contains both the epoxide group and the long-chain ester group. If both are present, the function returns True, indicating that the molecule is an epoxy derivative. If either structure is missing, it returns False. If any errors occur during execution, the function returns False.

## 5.2 Results of the exact search method

The summary of the number of manually labeled data for plasticizers supported by the exact search method and the number of chemicals matched is as follows:

Table S20. Toxicity prediction results using different molecular representations.

| Subcategories                   | Manually labeled data | Matched data |
|---------------------------------|-----------------------|--------------|
| Plasticizer_Phthalate           | 33                    | 111          |
| Plasticizer_Terephthalate       | 1                     | 52           |
| Plasticizer_Isophthalate        | 1                     | 20           |
| Plasticizer_Adipic acid esters  | 12                    | 53           |
| Plasticizer_Azelaic acid esters | 2                     | 8            |
| Plasticizer_Fumaric acid esters | 2                     | 17           |
| Plasticizer_Citric acid esters  | 5                     | 11           |
| Plasticizer_Trimellitate        | 4                     | 13           |



| Subcategories                    | Manually labeled data | Matched data |
|----------------------------------|-----------------------|--------------|
| Plasticizer_Itaconic acid esters | 2                     | 3            |
| Plasticizer_Maleic acid esters   | 4                     | 22           |
| Plasticizer_Oleate               | 5                     | 55           |
| Plasticizer_Sebacic acid esters  | 7                     | 6            |
| Plasticizer_Epoxy derivatives    | 5                     | 24           |

The exact search results for each plasticizer subclass supported by the exact search method, showing the top 50 matched molecules per category, are presented below.

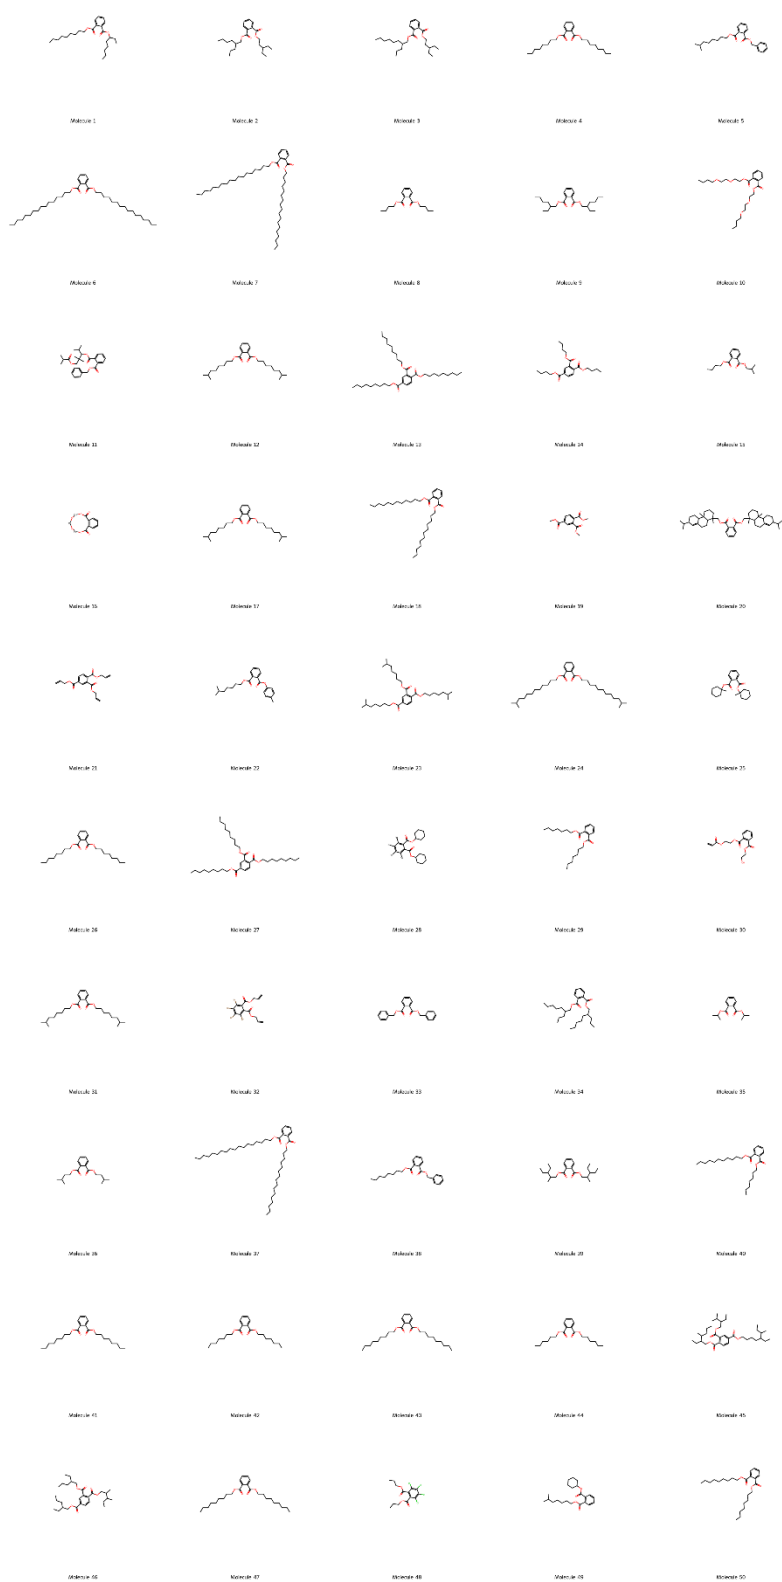

Figure S9. The results of the exact search method for matching phthalate plasticizers are presented below.

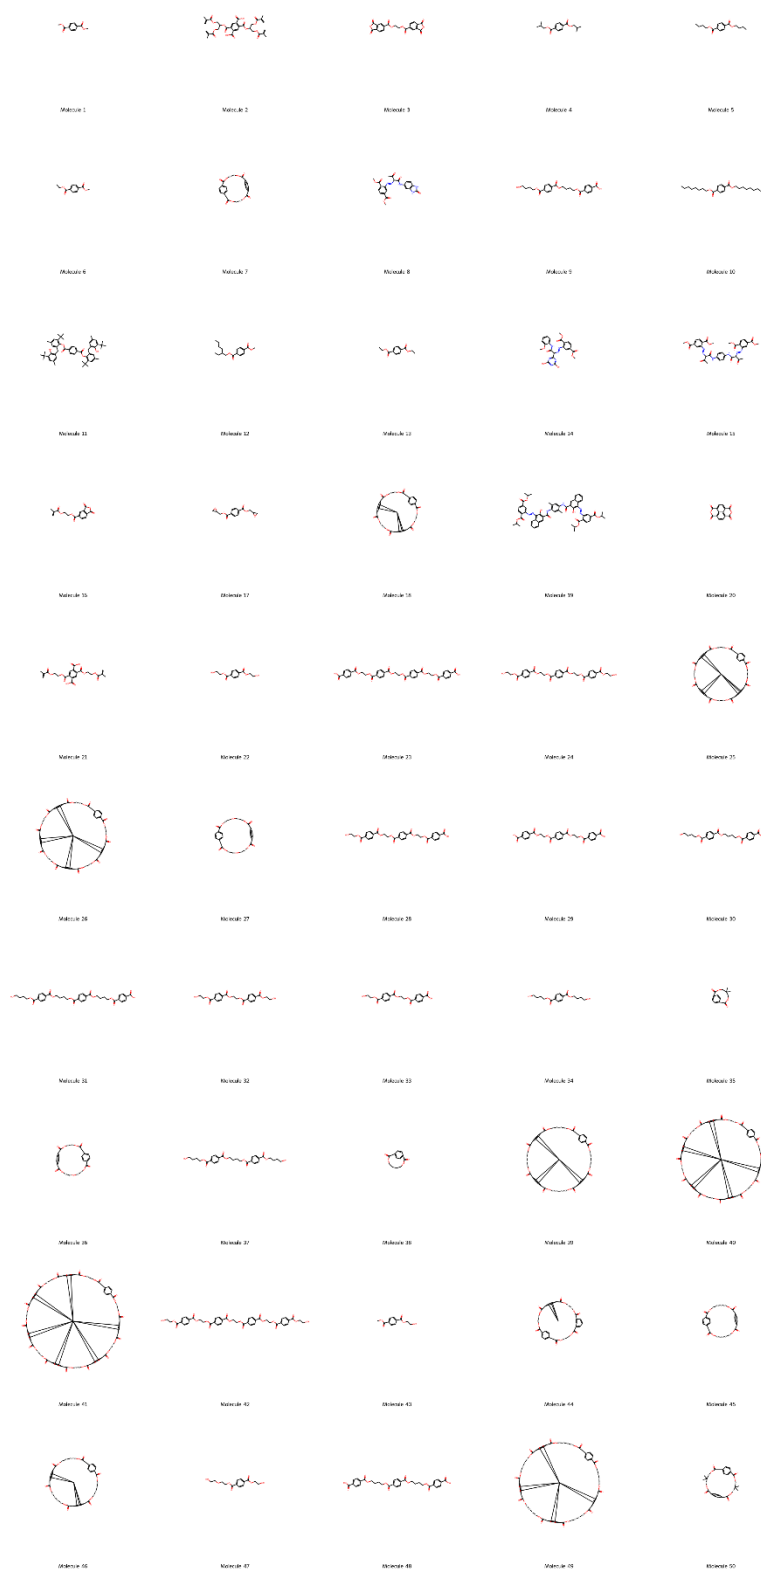

Figure S10. The results of the exact search method for matching terephthalate plasticizers are presented below.

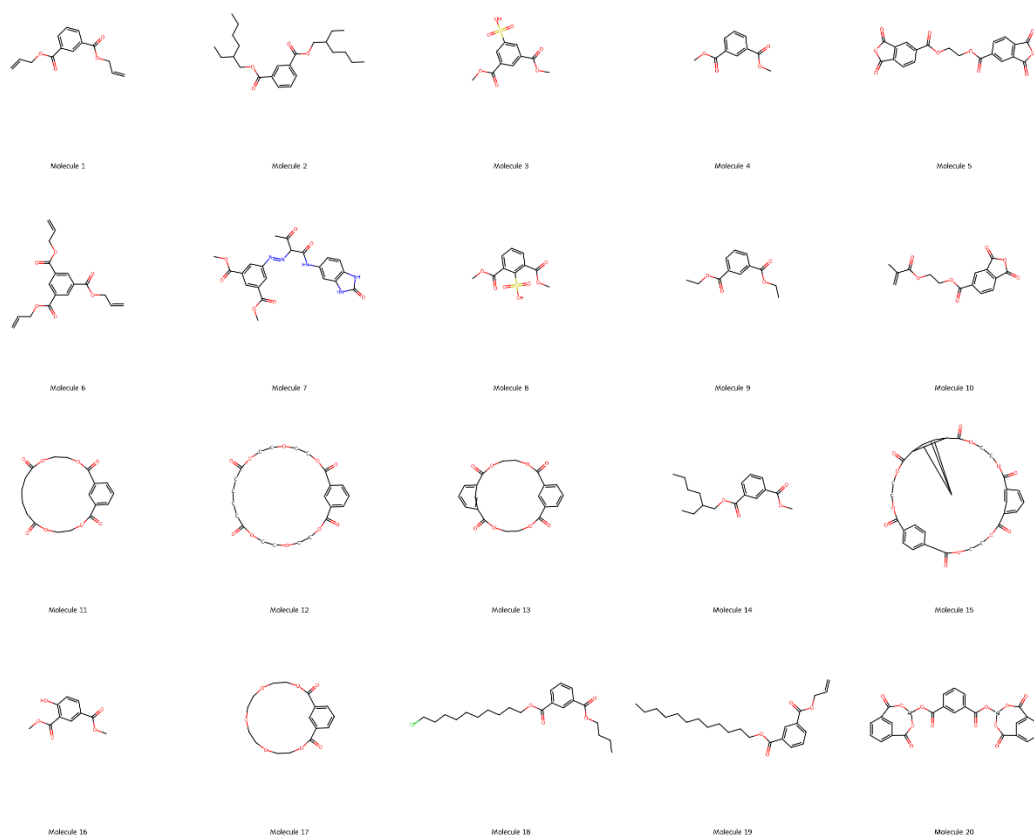

Figure S11. The results of the exact search method for matching isophthalate plasticizers are presented below.

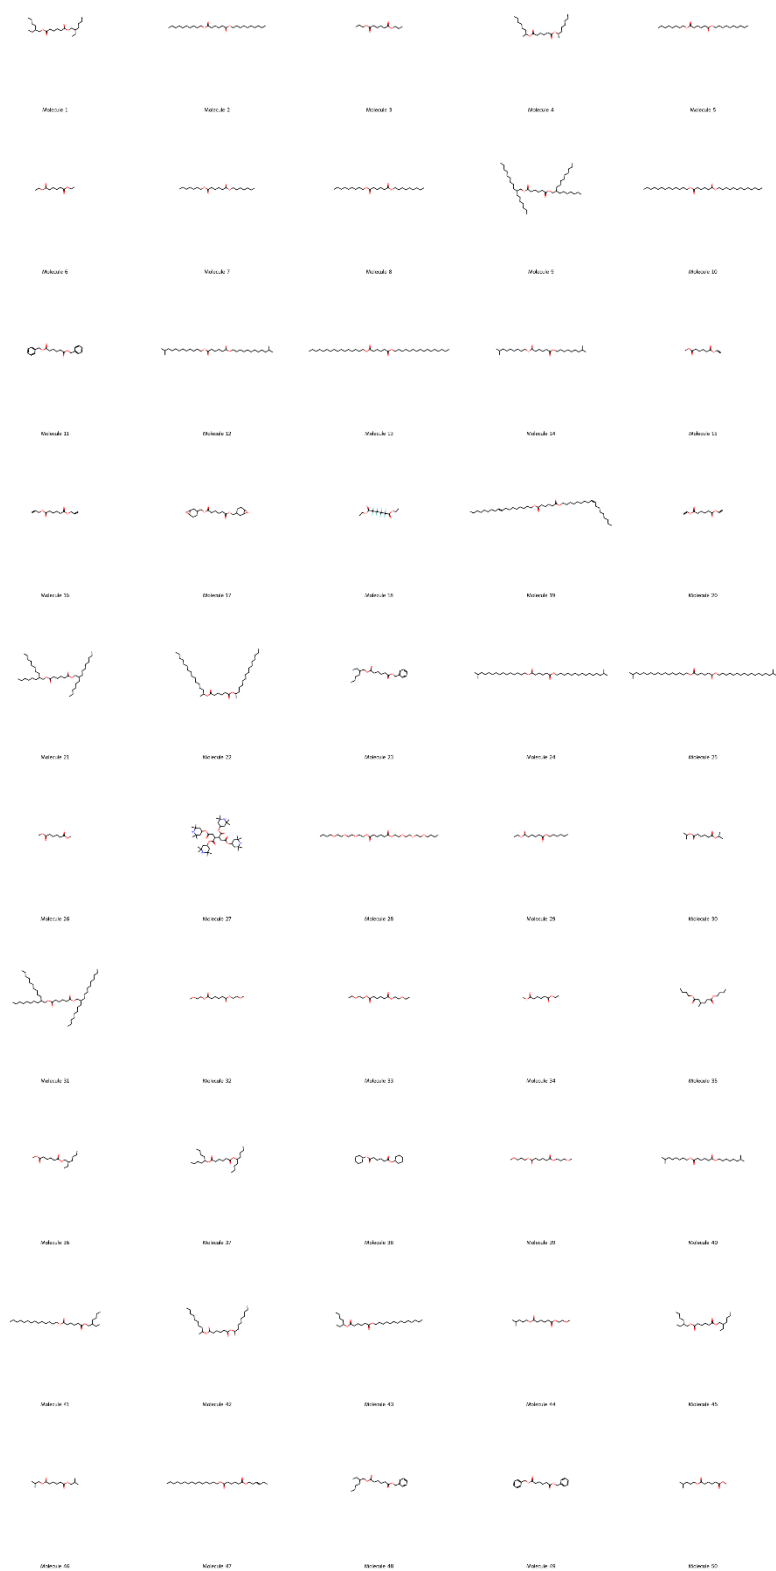

Figure S12. The results of the exact search method for matching adipic acid esters plasticizers are presented below.

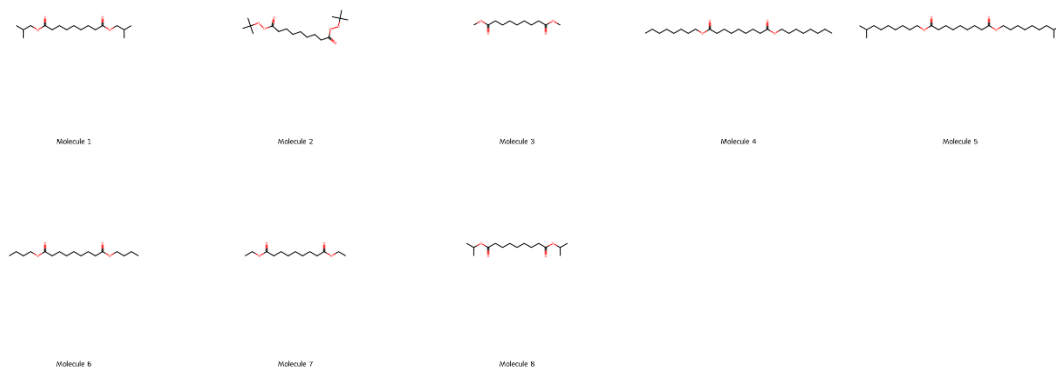

Figure S13. The results of the exact search method for matching azelaic acid esters plasticizers are presented below.

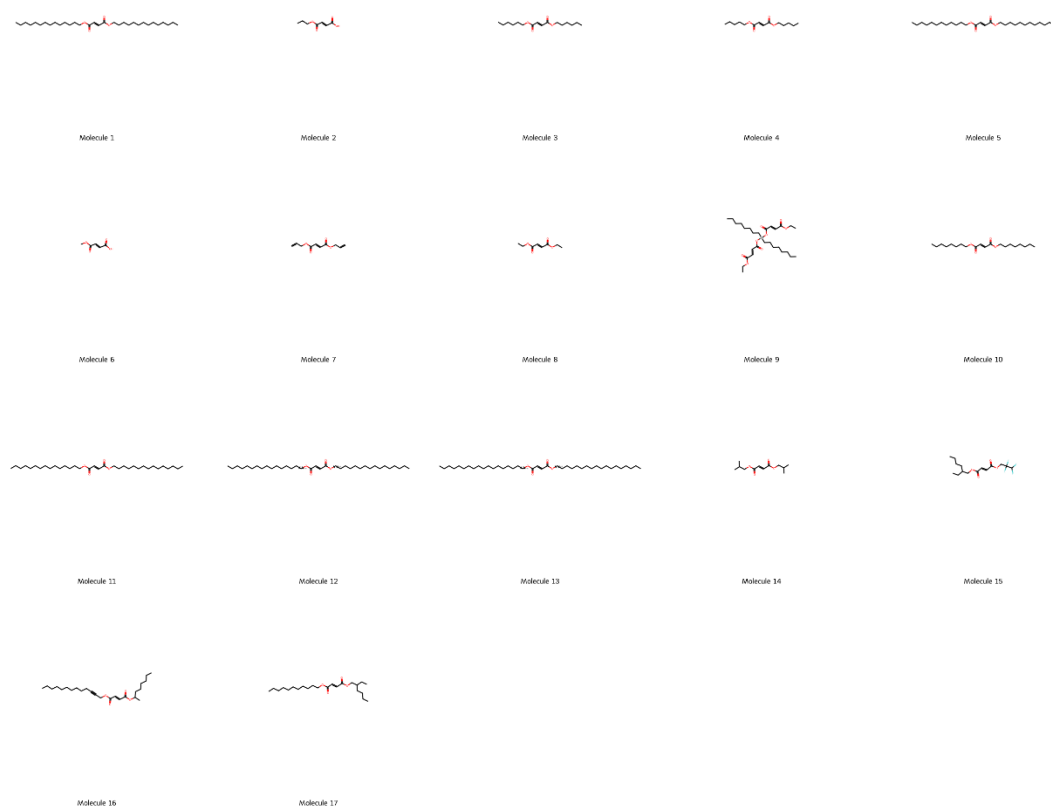

Figure S14. The results of the exact search method for matching fumaric acid esters plasticizers are presented below.

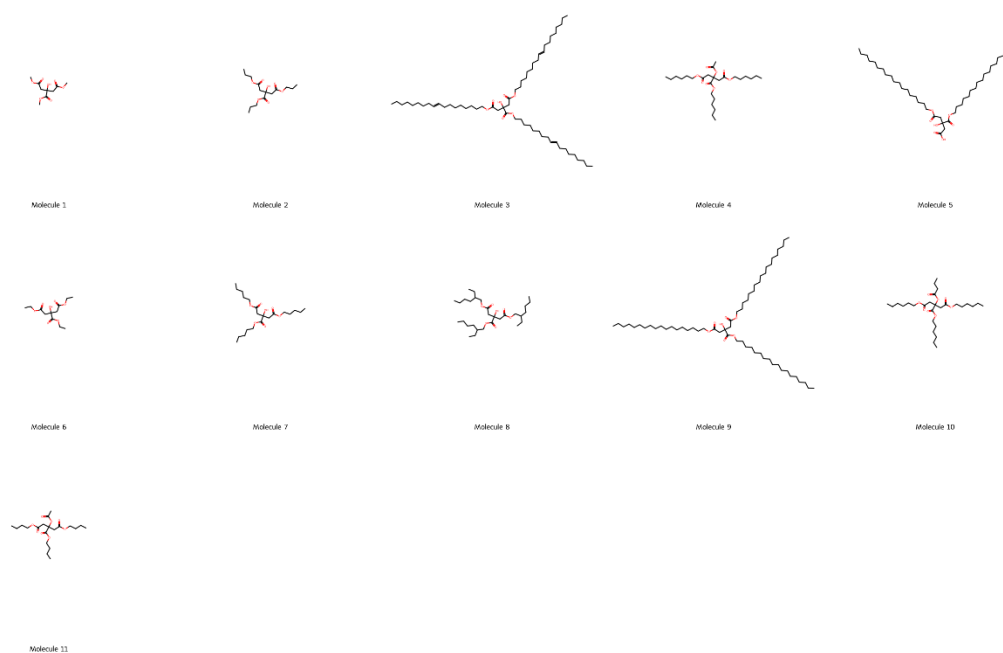

Figure S15. The results of the exact search method for matching citric acid esters plasticizers are presented below.

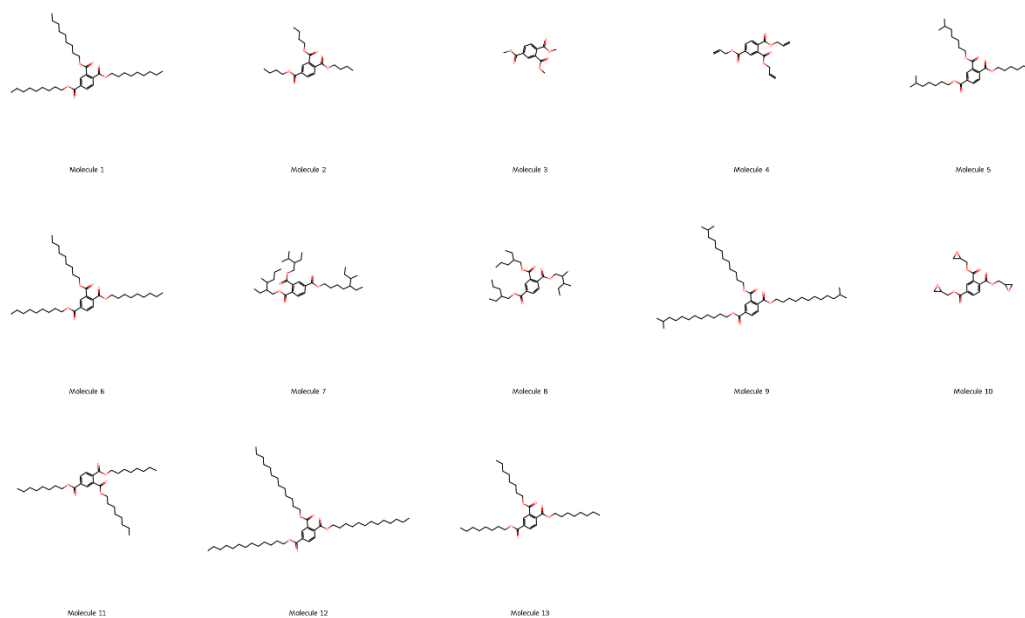

Figure S16. The results of the exact search method for matching trimellitate plasticizers are presented below.

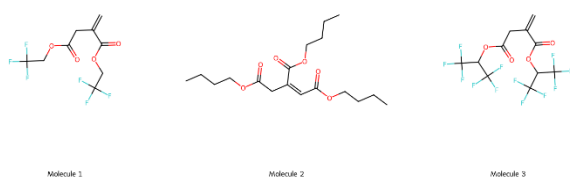

Figure S17. The results of the exact search method for matching itaconic acid esters plasticizers are presented below.

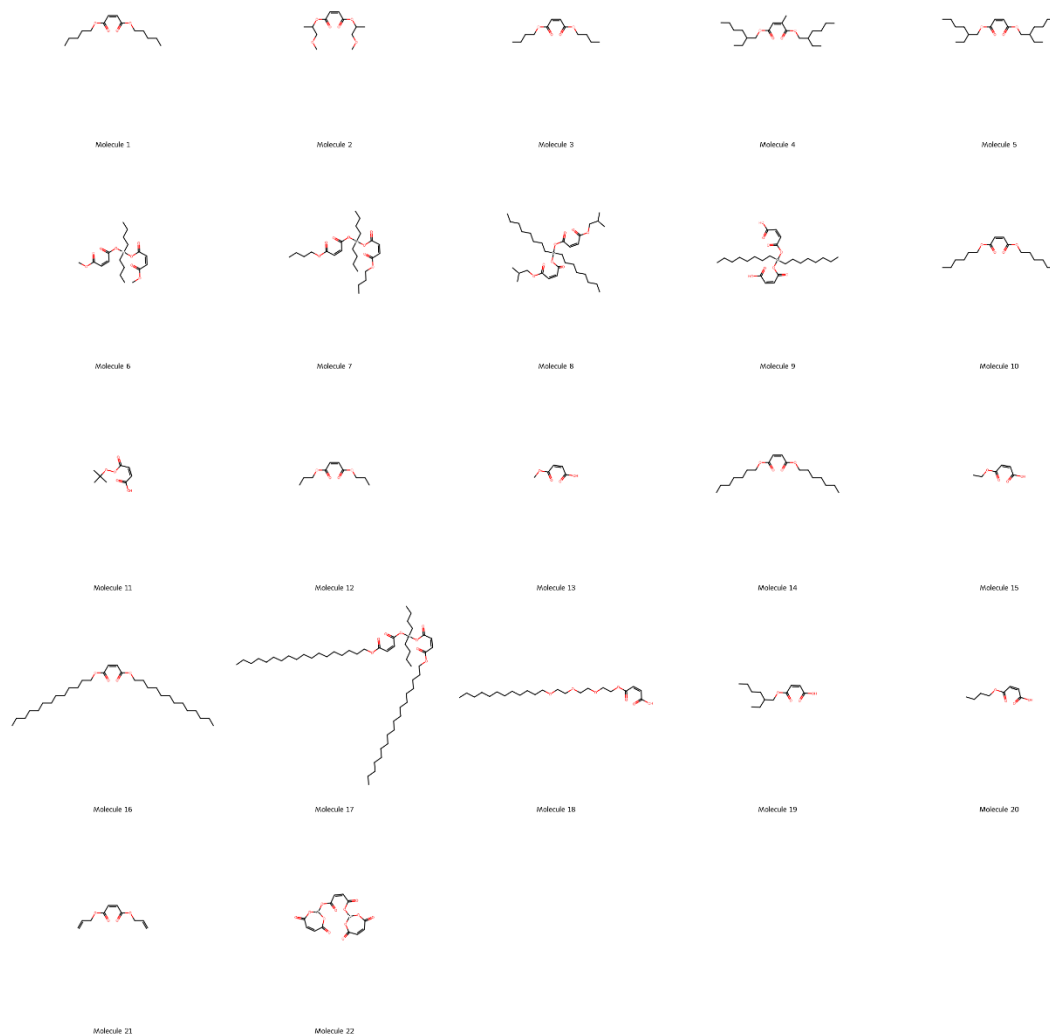

Figure S18. The results of the exact search method for matching maleic acid esters plasticizers are presented below.



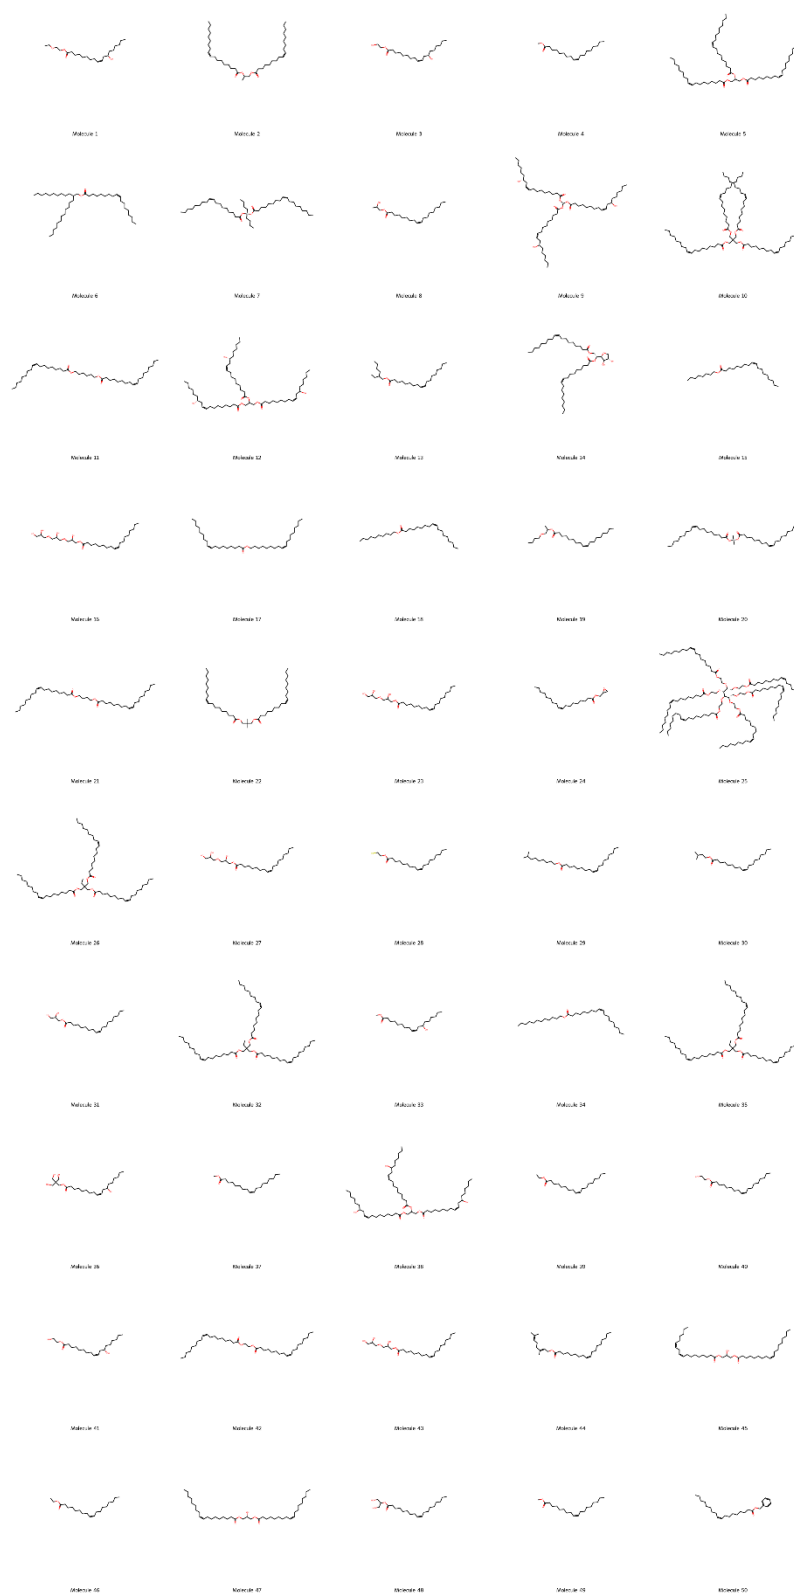

Figure S19. The results of the exact search method for matching oleate plasticizers are presented below.

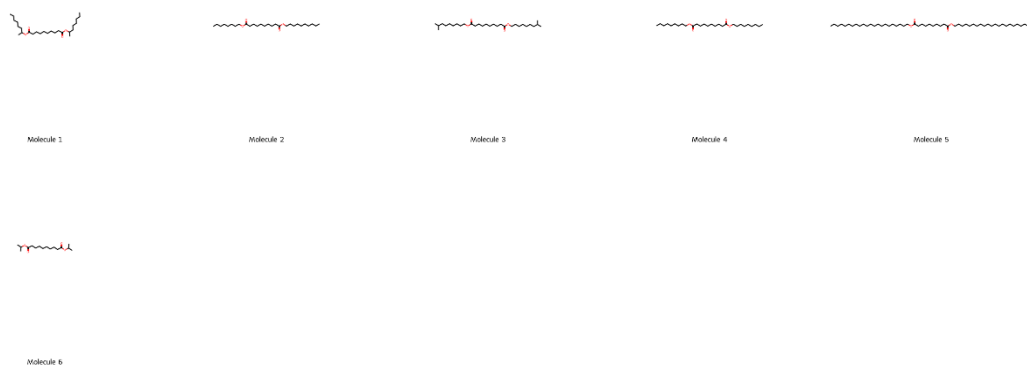

Figure S20. The results of the exact search method for matching sebacic acid esters plasticizers are presented below.

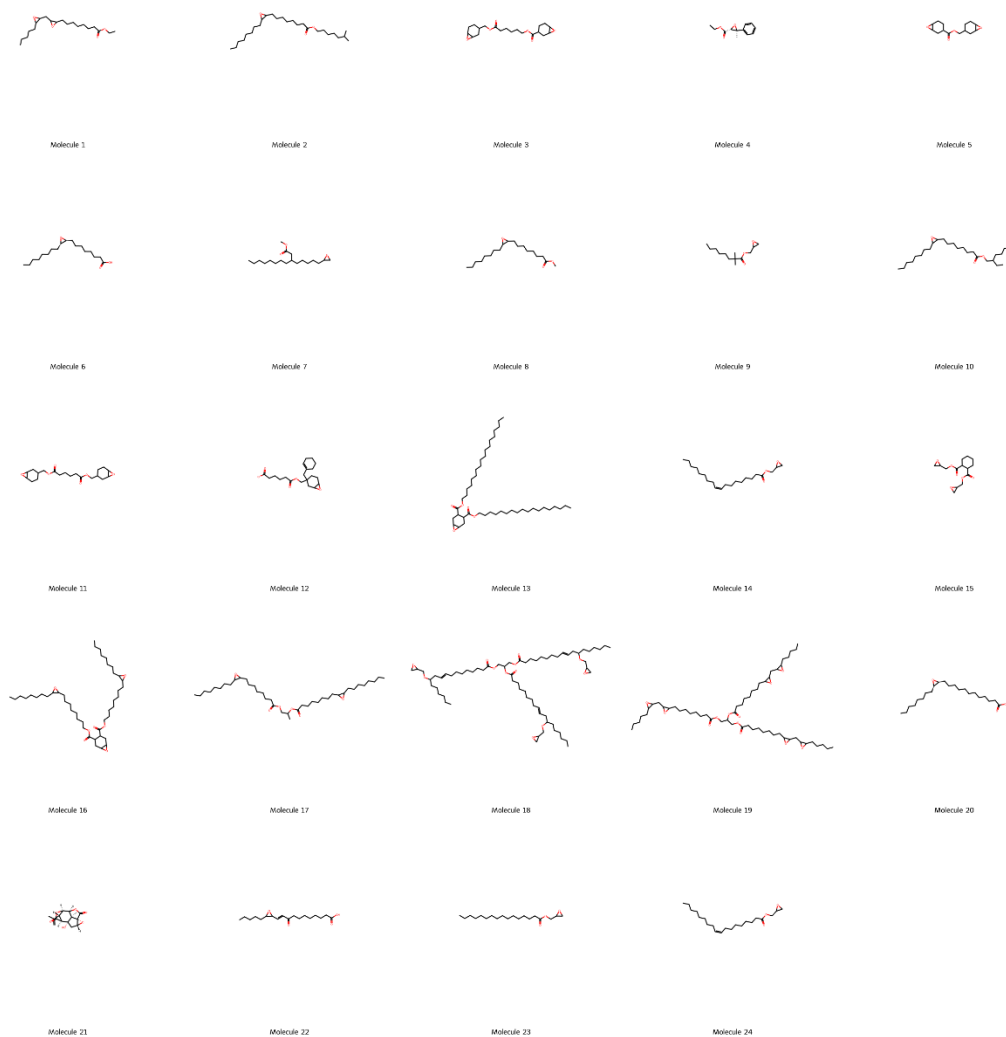

Figure S21. The results of the exact search method for matching epoxy derivatives plasticizers are presented below.

### 5.3 Results of the exact search method

In the manual validation results of the exact search, the structure scores of 25 samples are 1, the plasticizer classification scores of 13 samples are 1. In the comprehensive scores, 12 samples are scored 1, 13 samples are scored 0.5, and 1 sample is scored 0.

Table S21. Sampling manual verification results of exact search.

| Sub-<br>category    | CAS            | Name                                                                                                                                           | Structural<br>Score | Plasticizer<br>Function Score | Score |
|---------------------|----------------|------------------------------------------------------------------------------------------------------------------------------------------------|---------------------|-------------------------------|-------|
| Phthalate<br>esters | 13988<br>-26-6 | Cyclic DEG-PA                                                                                                                                  | 1                   | 1                             | 1     |
| Phthalate<br>esters | 16883<br>-83-3 | 1,2-<br>Benzenedicarboxylic<br>acid, 1-[2,2-dimethyl-1-<br>(1-methylethyl)-3-(2-<br>methyl-1-<br>oxopropoxy)propyl] 2-<br>(phenylmethyl) ester | 1                   | 1                             | 1     |

|                     |              |                                                                  |   |   |     |
|---------------------|--------------|------------------------------------------------------------------|---|---|-----|
| Adipic acid esters  | 4074-90-2    | Hexanedioic acid, 1,6-diethenyl ester                            | 1 | 0 | 0.5 |
| Adipic acid esters  | —            | Adipic acid, di(2-decyl) ester                                   | 1 | 1 | 1   |
| Sebacic acid esters | 10340-41-7   | Decanedioic acid, 1,10-bis(1-methylheptyl) ester                 | 1 | 0 | 0.5 |
| Sebacic acid esters | 12440-3-19-6 | Decanedioic acid, 1-decyl 10-octyl ester                         | 1 | 0 | 0.5 |
| Citric acid esters  | 4552-00-5    | Ethyl citrate                                                    | 1 | 1 | 1   |
| Citric acid esters  | 1587-20-8    | 2-hydroxy-1,2,3-propanetricarboxylic acid, 1,2,3-trimethyl ester | 1 | 1 | 1   |

|                          |                 |                                                                        |   |   |     |
|--------------------------|-----------------|------------------------------------------------------------------------|---|---|-----|
| Epoxy<br>derivativ<br>es | 26761<br>-45-5  | Neodecanoic acid, 2-oxiranylmethyl ester                               | 1 | 0 | 0.5 |
| Epoxy<br>derivativ<br>es | 67860<br>-05-3  | 2-Oxiraneoctanoic acid, 3-octyl-, 2,2'-(1-methyl-1,2-ethanediyl) ester | 1 | 0 | 0.5 |
| Oleate                   | 57675<br>-44-2  |                                                                        | 1 | 0 | 0.5 |
| Oleate                   | 12625<br>7-84-9 | 2-decyltetradecyl oleate                                               | 1 | 0 | 0.5 |
| Trimellit<br>ate         | 94109<br>-09-8  | Benzenetricarboxylic acid, 1,2,4-tritridecyl ester                     | 1 | 1 | 1   |
| Trimellit<br>ate         | 7237-83-4       | Benzenetricarboxylic acid, 1,2,4-tris(2-oxiranylmethyl) ester          | 1 | 0 | 0.5 |
| Maleic<br>acid<br>esters | 10099<br>-71-5  | 2-Butenedioic acid (2Z)-, 1,4-dipentyl ester                           | 1 | 1 | 1   |

|          |        |                           |   |   |     |
|----------|--------|---------------------------|---|---|-----|
| Maleic   |        |                           |   |   |     |
| acid     | 31983  |                           |   |   |     |
| esters   | -42-3  | HEPTYL MALEATE            | 1 | 1 | 1   |
| Azelaic  |        | Nonanediperoxoic acid,    |   |   |     |
| acid     | 16580  | bis(1,1-dimethylethyl)    | 1 | 0 | 0.5 |
| esters   | -06-6  | ester                     |   |   |     |
| Azelaic  |        |                           |   |   |     |
| acid     | 2917-  | Nonanedioic acid, 1,9-    |   |   |     |
| esters   | 73-9   | dibutyl ester             | 1 | 1 | 1   |
| Fumaric  |        | 2-Butenedioic acid        |   |   |     |
| acid     | 10341  | (2E)-, 1,4-ditetradecyl   | 1 | 1 | 1   |
| esters   | -03-4  | ester                     |   |   |     |
| Fumaric  |        |                           |   |   |     |
| acid     | 14595  | PROPYL FUMARATE           | 1 | 0 | 0.5 |
| esters   | -35-8  |                           |   |   |     |
| Itaconic |        | Butanedioic acid, 2-      |   |   |     |
| acid     | 10453  | methylene-, 1,4-          |   |   |     |
| esters   | 4-96-5 | bis(2,2,2-trifluoroethyl) | 1 | 1 | 0.5 |
|          |        | ester                     |   |   |     |

|                            |                |                                                                  |   |   |     |
|----------------------------|----------------|------------------------------------------------------------------|---|---|-----|
| Itaconic<br>acid<br>esters | 7568-<br>58-3  | 1-Propene-1,2,3-<br>tricarboxylic acid, 1,2,3-<br>tributyl ester | 1 | 1 | 1   |
|                            |                | 1,3-                                                             |   |   |     |
| Isophthal<br>ate           | 1087-<br>21-4  | Benzenedicarboxylic<br>acid, 1,3-di-2-propen-1-<br>yl ester      | 1 | 1 | 1   |
| Isophthal<br>ate           | —              | Isophthalic acid, butyl<br>10-chlorodecyl ester                  | 1 | 0 | 0.5 |
| Terephth<br>alate          | 81-<br>30-1    | [2]Benzopyrano[6,5,4-<br>def][2]benzopyran-<br>1,3,6,8-tetrone   | 0 | 0 | 0   |
| Terephth<br>alate          | 34298<br>-51-6 | L[TPA+EG] <sub>4</sub> +EG                                       | 1 | 0 | 0.5 |

---

## 6. Details of Discussion

### 6.1 Results of functional–toxicological relationship

#### 1) Direct statistics results

The average toxicity statistics for all chemicals under each third-level functional label (considering only manually labeled chemicals) are presented below.

Table S22. The average toxicity of chemicals corresponding to each third-level functional label

| Num. | Sum  | CMR  | STOT_RE | AqTox | RespSens |
|------|------|------|---------|-------|----------|
| C00  | 0.94 | 0.00 | 0.03    | 0.91  | 0.00     |
| C01  | 0.00 | 0.00 | 0.00    | 0.00  | 0.00     |
| C02  | 0.00 | 0.00 | 0.00    | 0.00  | 0.00     |
| C03  | 0.08 | 0.00 | 0.00    | 0.00  | 0.00     |
| C04  | 0.00 | 0.00 | 0.00    | 0.00  | 0.00     |
| C05  | 0.00 | 0.00 | 0.00    | 0.00  | 0.00     |
| C06  | 0.00 | 0.00 | 0.00    | 0.00  | 0.00     |
| C07  | 0.25 | 0.00 | 0.00    | 0.25  | 0.00     |
| C08  | 0.50 | 0.50 | 0.00    | 0.00  | 0.00     |
| C09  | 0.00 | 0.00 | 0.00    | 0.00  | 0.00     |
| C10  | 0.50 | 0.25 | 0.00    | 0.00  | 0.00     |
| C11  | 0.00 | 0.00 | 0.00    | 0.00  | 0.00     |



| Num. | Sum  | CMR  | STOT_RE | AqTox | RespSens |
|------|------|------|---------|-------|----------|
| C12  | 0.00 | 0.00 | 0.00    | 0.00  | 0.00     |
| C13  | 0.00 | 0.00 | 0.00    | 0.00  | 0.00     |
| C14  | 0.67 | 0.00 | 0.00    | 0.67  | 0.00     |
| C15  | 0.12 | 0.00 | 0.00    | 0.12  | 0.00     |
| C16  | 0.60 | 0.20 | 0.20    | 0.20  | 0.00     |
| C17  | 0.50 | 0.42 | 0.00    | 0.00  | 0.00     |
| C18  | 1.00 | 0.00 | 0.00    | 1.00  | 0.00     |
| C19  | 0.50 | 0.00 | 0.50    | 0.00  | 0.00     |
| C20  | 0.46 | 0.13 | 0.21    | 0.13  | 0.00     |
| C21  | 0.40 | 0.00 | 0.13    | 0.00  | 0.13     |
| C22  | 0.00 | 0.00 | 0.00    | 0.00  | 0.00     |
| C23  | 0.07 | 0.00 | 0.00    | 0.07  | 0.00     |
| C24  | 0.00 | 0.00 | 0.00    | 0.00  | 0.00     |
| C25  | 0.36 | 0.07 | 0.00    | 0.21  | 0.00     |
| C26  | 0.20 | 0.00 | 0.10    | 0.10  | 0.00     |
| C27  | 0.17 | 0.00 | 0.00    | 0.17  | 0.00     |
| C28  | 0.00 | 0.00 | 0.00    | 0.00  | 0.00     |
| C29  | 0.00 | 0.00 | 0.00    | 0.00  | 0.00     |

| Num. | Sum  | CMR  | STOT_RE | AqTox | RespSens |
|------|------|------|---------|-------|----------|
| C30  | 0.15 | 0.15 | 0.00    | 0.00  | 0.00     |
| C31  | 0.57 | 0.00 | 0.00    | 0.57  | 0.00     |
| C32  | 0.00 | 0.00 | 0.00    | 0.00  | 0.00     |
| C33  | 0.10 | 0.05 | 0.00    | 0.05  | 0.00     |
| C34  | 1.67 | 0.33 | 0.67    | 0.33  | 0.00     |
| C35  | 3.50 | 1.00 | 1.00    | 1.00  | 0.00     |
| C36  | 0.50 | 0.00 | 0.00    | 0.50  | 0.00     |
| C37  | 0.00 | 0.00 | 0.00    | 0.00  | 0.00     |
| C38  | 0.50 | 0.25 | 0.00    | 0.25  | 0.00     |
| C39  | 0.65 | 0.09 | 0.07    | 0.40  | 0.00     |
| C40  | 2.55 | 0.73 | 0.64    | 0.55  | 0.00     |
| C41  | 0.57 | 0.33 | 0.05    | 0.10  | 0.00     |
| C42  | 0.25 | 0.00 | 0.00    | 0.00  | 0.00     |
| C43  | 0.10 | 0.00 | 0.00    | 0.10  | 0.00     |
| C44  | 1.58 | 0.36 | 0.24    | 0.70  | 0.00     |
| C45  | 3.22 | 0.67 | 0.67    | 0.89  | 0.00     |
| C46  | 1.00 | 0.00 | 0.40    | 0.60  | 0.00     |
| C47  | 0.33 | 0.00 | 0.00    | 0.33  | 0.00     |

| Num. | Sum  | CMR  | STOT_RE | AqTox | RespSens |
|------|------|------|---------|-------|----------|
| C48  | 0.00 | 0.00 | 0.00    | 0.00  | 0.00     |
| C49  | 0.30 | 0.20 | 0.00    | 0.10  | 0.00     |
| C50  | 0.25 | 0.13 | 0.13    | 0.00  | 0.00     |
| C51  | 1.57 | 0.21 | 0.64    | 0.43  | 0.00     |
| C52  | 0.14 | 0.07 | 0.04    | 0.00  | 0.00     |
| C53  | 0.00 | 0.00 | 0.00    | 0.00  | 0.00     |
| C54  | 0.92 | 0.03 | 0.33    | 0.50  | 0.00     |
| C55  | 0.27 | 0.00 | 0.18    | 0.09  | 0.00     |
| C56  | 0.25 | 0.00 | 0.08    | 0.00  | 0.00     |
| C57  | 0.18 | 0.14 | 0.00    | 0.05  | 0.00     |
| C58  | 3.00 | 0.50 | 1.00    | 1.00  | 0.00     |
| C59  | 0.71 | 0.06 | 0.35    | 0.24  | 0.00     |
| C60  | 0.93 | 0.27 | 0.07    | 0.20  | 0.07     |
| C61  | 0.50 | 0.25 | 0.25    | 0.00  | 0.00     |
| C62  | 0.50 | 0.00 | 0.00    | 0.50  | 0.00     |
| C63  | 0.00 | 0.00 | 0.00    | 0.00  | 0.00     |
| C64  | 1.40 | 0.60 | 0.40    | 0.40  | 0.00     |
| C65  | 1.67 | 0.00 | 0.67    | 0.33  | 0.00     |

| Num. | Sum  | CMR  | STOT_RE | AqTox | RespSens |
|------|------|------|---------|-------|----------|
| C66  | 3.00 | 1.00 | 1.00    | 0.00  | 0.00     |
| C67  | 0.00 | 0.00 | 0.00    | 0.00  | 0.00     |
| C68  | 0.00 | 0.00 | 0.00    | 0.00  | 0.00     |
| C69  | 0.00 | 0.00 | 0.00    | 0.00  | 0.00     |
| C70  | 0.00 | 0.00 | 0.00    | 0.00  | 0.00     |
| C71  | 0.08 | 0.00 | 0.00    | 0.08  | 0.00     |
| C72  | 0.00 | 0.00 | 0.00    | 0.00  | 0.00     |
| C73  | 0.44 | 0.00 | 0.22    | 0.22  | 0.00     |
| C74  | 0.30 | 0.00 | 0.20    | 0.10  | 0.00     |
| C75  | 0.00 | 0.00 | 0.00    | 0.00  | 0.00     |
| C76  | 0.80 | 0.20 | 0.20    | 0.40  | 0.00     |
| C77  | 2.00 | 0.33 | 0.67    | 0.67  | 0.00     |
| C78  | 2.00 | 0.00 | 1.00    | 1.00  | 0.00     |
| C79  | 0.00 | 0.00 | 0.00    | 0.00  | 0.00     |
| C80  | 1.50 | 0.50 | 1.00    | 0.00  | 0.00     |
| C81  | 0.00 | 0.00 | 0.00    | 0.00  | 0.00     |
| C82  | 0.00 | 0.00 | 0.00    | 0.00  | 0.00     |

To further illustrate these patterns, we calculated, for each functional class and each

toxicity endpoint, the proportion of additives with a positive prediction. Since the toxicity labels are binary, this proportion equals the mean of the 0 or 1 values within each functional class. We arranged these proportions into an 83 by 7 matrix and visualized it as a heatmap.

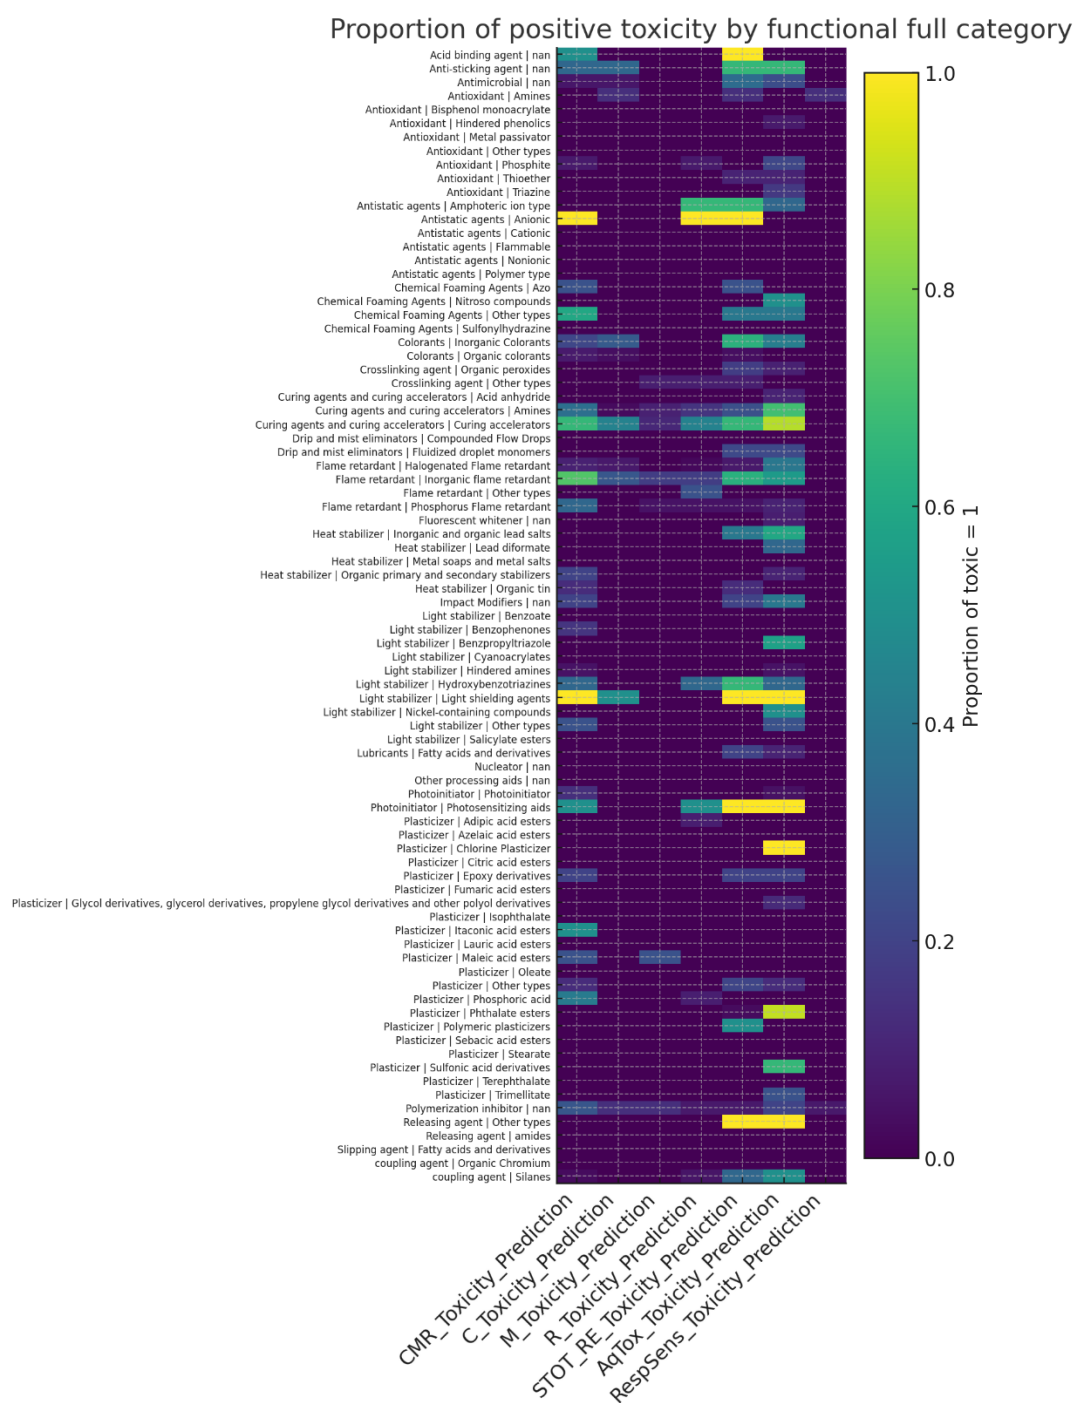

Figure S22. The heatmap of the 83 third-level functional labels and 7 toxicity indicators.

## 2) Method of Pearson's chi-square test

To test whether the distribution of toxicity labels differs across functional classes, we constructed, for each toxicity endpoint, a contingency table with 83 rows (functional classes) and 2 columns (negative and positive labels). Let  $O_{ij}$  denote the observed count in row  $i$  and column  $j$  of a given contingency table, and let

$$E_{ij} = \frac{(\text{row sum}_i) \times (\text{column sum}_j)}{N}$$

be the expected count under the null hypothesis that functional class and toxicity endpoint are independent, where  $N$  is the total number of additives. The Pearson chi square statistic is calculated as

$$\chi^2 = \sum_{i=1}^r \sum_{j=1}^c \frac{(O_{ij} - E_{ij})^2}{E_{ij}}$$

with  $r = 83$  and  $c = 2$ . The degrees of freedom are  $df = (r - 1)(c - 1) = 82$ . For each endpoint, we obtained a p value by comparing the observed  $\chi^2$  to a chi square distribution with 82 degrees of freedom. A small p value indicates that the observed contingency table is unlikely under the independence assumption and therefore provides evidence of an association between functional class and the toxicity endpoint. In this work we regard  $p < 0.05$  as statistically significant.

Because p values depend on sample size, we additionally quantified the strength of association using Cramer's V, which is a standard effect size for contingency tables. For an  $r \times c$  table with chi square statistic  $\chi^2$  and sample size  $N$ , Cramer's V is defined as

$$V = \sqrt{\frac{\chi^2}{N \times \min(r-1, c-1)}}$$

Cramer's V ranges from 0 (no association) to 1 (perfect association). Interpretation thresholds are context dependent, but values around 0.1 are often considered small, around 0.3 moderate and above 0.5 relatively strong.

### 3) Results of Pearson's chi-square test

Table S23. Results of Pearson's chi-square test.

| Toxicity endpoint            | $\chi^2$ | df | p-value      | Cramer's V |
|------------------------------|----------|----|--------------|------------|
| CMR_Toxicity_Prediction      | 223.3297 | 82 | 4.999984e-15 | 0.5442     |
| C_Toxicity_Prediction        | 160.2123 | 82 | 5.445130e-07 | 0.4610     |
| M_Toxicity_Prediction        | 85.8802  | 82 | 3.630830e-01 | 0.3375     |
| R_Toxicity_Prediction        | 179.8895 | 82 | 2.715783e-09 | 0.4884     |
| STOT_RE_Toxicity_Prediction  | 260.1241 | 82 | 2.121680e-20 | 0.5874     |
| AqTox_Toxicity_Prediction    | 310.9374 | 82 | 2.305561e-28 | 0.6422     |
| RespSens_Toxicity_Prediction | 81.1005  | 82 | 5.073262e-01 | 0.3280     |

## 6.2 Illustrative cases of plastic formulation

The formulations of five agricultural plastic films are presented in the following case studies.

Table S24. Different PVC agricultural films use various additives choices in their formulations, calculated using the mass parts counting method <sup>[2-8]</sup>.

| Additives                  | Formula<br>-tion 1 | Formula<br>-tion 2 | Formula<br>-tion 3 | Formula<br>-tion 4 | Formula<br>-tion 5 |
|----------------------------|--------------------|--------------------|--------------------|--------------------|--------------------|
| PVC                        | 100                | 100                | 100                | 100                | 100                |
| Calcium Carbonate          | 0                  | 0.5                | 0                  | 0                  | 0                  |
| Carbon Black               | 0                  | 0                  | 0                  | 0.4                | 0                  |
| Di(2-ethylhexyl) Phthalate | 40                 | 25                 | 20                 | 45                 | 40                 |
| Di(n-butyl) Phthalate      | 0                  | 10                 | 10                 | 0                  | 0                  |
| Di(2-ethylhexyl) Adipate   | 7                  | 5                  | 0                  | 0                  | 0                  |
| Epoxidized Soybean Oil     | 3                  | 3                  | 3.5                | 0                  | 0                  |
| Other Plasticizer          | 0                  | 0                  | 3                  | 5.5                | 0                  |
| Tribasic Lead Sulfate      | 0                  | 0                  | 2.25               | 0                  | 0                  |
| Glyceryl Monostearate      | 0                  | 3                  | 0                  | 0                  | 0                  |
| Cadmium/Barium Stearate    | 3                  | 2.5                | 0                  | 1                  | 1                  |
| Dibutyltin Laurate         | 0                  | 0.5                | 0                  | 0                  | 0                  |



## Ref.

- [1] Ertl, P.; Rohde, B.; Selzer, P. Fast Calculation of Molecular Polar Surface Area as a Sum of Fragment-Based Contributions and Its Application to the Prediction of Drug Transport Properties. *Journal of Medicinal Chemistry* 2000, 43 (20), 3714-3717. DOI: 10.1021/jm000942e.
- [2] Bing,J.L.;Zhao,J.S.;Bao,Y.Z. Polyvinyl chloride resins and their applications; Chemical Industry Press: China, 2012.
- [3] Wang, X.W.; Wang, W.; Liu, Q. Plastic additives and formulation design technologies; Chemical Industry Press: China, 2017.
- [4] Lei,C.H.;Xu,R.J.;Dong,Z.H.;Chen,D.H.Plastic materials and additives; China Light Industry Press:China, 2021.
- [5] Zuo,J.D.;Luo,C.Y.;Wang,W.G. Plastic Additives and Formulation; Chemical Industry Press: China, 2018.
- [6] Li,J.J. Formulation Design of Plastics (3rd Edition); China Light Industry Press:China, 2019.
- [7] Gong,L.C.;Zheng,D.;Li,J. Polyvinyl chloride plastic additives and formulation design technology; China Light Industry Press:China, 2006.
- [8] Wang,W.G.;Yan,Y.F. Plastic Formulas; Chemical Industry Press: China, 2008.
- [9] Cronin, M. T. D.; Richarz, A.-N. Relationship Between Adverse Outcome Pathways and Chemistry-Based In Silico Models to Predict Toxicity. *Applied In Vitro Toxicology* 2017, 3, 286–297.

- [10] Escher, B. I.; Hackermüller, J.; Polte, T.; Scholz, S.; Aigner, A.; Altenburger, R.; et al. From the Exposome to Mechanistic Understanding of Chemical-Induced Adverse Effects. *Environment International* 2017, 99, 97–106.
- [11] AOP-Wiki. Collaborative Adverse Outcome Pathway Wiki; <https://aopwiki.org> (accessed November 2025).
- [12] Cho, E.; Allemang, A.; Audebert, M.; Chauhan, V.; Dertinger, S.; Hendriks, G.; et al. AOP Report: Development of an Adverse Outcome Pathway for Oxidative DNA Damage Leading to Mutations and Chromosomal Aberrations. OECD Series on Adverse Outcome Pathways, No. 29; OECD Publishing: Paris, 2022.
- [13] Yauk, C.; Lambert, I.; Marchetti, F.; Douglas, G. Adverse Outcome Pathway on Alkylation of DNA in Male Pre-Meiotic Germ Cells Leading to Heritable Mutations. OECD Series on Adverse Outcome Pathways, No. 3; OECD Publishing: Paris, 2016.
- [14] AOP-Wiki. AOP 295: Early-Life Stromal Estrogen Receptor Activation by Endocrine Disrupting Chemicals in the Mammary Gland Leading to Enhanced Cancer Risk; <https://aopwiki.org/aops/295> (accessed November 2025).
- [15] Landesmann, B. Adverse Outcome Pathway on Protein Alkylation Leading to Liver Fibrosis. OECD Series on Adverse Outcome Pathways, No. 2; OECD Publishing: Paris, 2016.
- [16] AOP-Wiki. AOP 27: Bile Salt Export Pump Inhibition Leading to Cholestatic Liver Injury; AOP-Wiki (accessed November 2025).
- [17] AOP-Wiki. AOP 312: Acetylcholinesterase Inhibition Leading to Acute Mortality via Impaired Coordination and Movement; AOP-Wiki (accessed November 2025).

- [18] AOP-Wiki. AOP 370: Photosystem II Antagonism Leading to Growth Inhibition via Suppression of Photosynthesis; AOP-Wiki (OECD AOP Knowledge Base), <https://aopwiki.org/aops/370> (accessed November 2025).
- [19] AOP-Wiki. AOP 39: Sensitization of the Respiratory Tract by Low-Molecular-Weight Organic Chemicals; AOP-Wiki (accessed November 2025).
- [20] OECD. Guidance Document 116 on the Conduct and Design of Chronic Toxicity and Carcinogenicity Studies, Supporting Test Guidelines 451, 452 and 453, 2nd ed.; OECD Publishing: Paris, 2012.
- [21] OECD. Test No. 487: In Vitro Mammalian Cell Micronucleus Test. OECD Guidelines for the Testing of Chemicals, Section 4; OECD Publishing: Paris, 2010.
- [22] OECD. Test No. 421: Reproduction/Developmental Toxicity Screening Test. OECD Guidelines for the Testing of Chemicals, Section 4; OECD Publishing: Paris, 2015.
- [23] OECD. Test No. 407: Repeated Dose 28-Day Oral Toxicity Study in Rodents. OECD Guidelines for the Testing of Chemicals, Section 4; OECD Publishing: Paris, 2008.
- [24] OECD. Test No. 408: Repeated Dose 90-Day Oral Toxicity Study in Rodents. OECD Guidelines for the Testing of Chemicals, Section 4; OECD Publishing: Paris, 2018.
- [25] OECD. Test No. 203: Fish, Acute Toxicity Test. OECD Guidelines for the Testing of Chemicals, Section 2; OECD Publishing: Paris, 2019.
- [26] OECD. Test No. 202: Daphnia sp. Acute Immobilisation Test. OECD Guidelines

for the Testing of Chemicals, Section 2; OECD Publishing: Paris, 2004.

[27] OECD. Test No. 201: Freshwater Alga and Cyanobacteria, Growth Inhibition Test. OECD Guidelines for the Testing of Chemicals, Section 2; OECD Publishing: Paris, 2011.

[28] Sullivan, K. M.; Enoch, S. J.; Ezendam, J.; Roggen, E. L.; Aleksic, M.; Aspinall, A.; et al. An Adverse Outcome Pathway for Sensitization of the Respiratory Tract by Low-Molecular-Weight Organic Chemicals. *Applied In Vitro Toxicology* 2017, 3, 213–226.

[29] Upadhyay, S.; Palmberg, L. Air–Liquid Interface: Relevant In Vitro Models for Investigating Air Pollutant-Induced Pulmonary Toxicity. *Toxicological Sciences* 2018, 164, 21–30.

[30] OECD. OECD QSAR Toolbox; <https://qsartoolbox.org> (accessed November 2025).
